# Supplementary material
Source: publisher figshare collection journal article supplement (https://acs.figshare.com/ndownloader/files/3850561)

## **Supporting Information**

### **A Clickable Analogue of Cerulenin as Chemical Probe to Explore Protein Palmitoylation**

Baohui Zheng, Shunying Zhu, and Xu Wu\*

Cutaneous Biology Research Center, Massachusetts General Hospital, Harvard Medical School,

Building 149, 13th street, Charlestown, MA 02129, USA

\*Corresponding author

Email: [xwu@cbrc2.mgh.harvard.edu](mailto:xwu@cbrc2.mgh.harvard.edu)

## General procedures

All chemicals were purchased from Sigma-aldrich, Alfa Aesar, Fisher Scientific or Acros and were used as received. Azide-biotin was purchased from Click Chemistry Tools. The silica gel used in flash column chromatography was from Aldrich (Cat. 60737, pore size 60 Å, 230-400 mesh). The  $^1\text{H}$  and  $^{13}\text{C}$  NMR spectra were obtained on a Varian 500M spectrometer. Chemical shifts are reported in  $\delta$  ppm values downfield from tetramethylsilane and  $J$  values are reported in Hz.

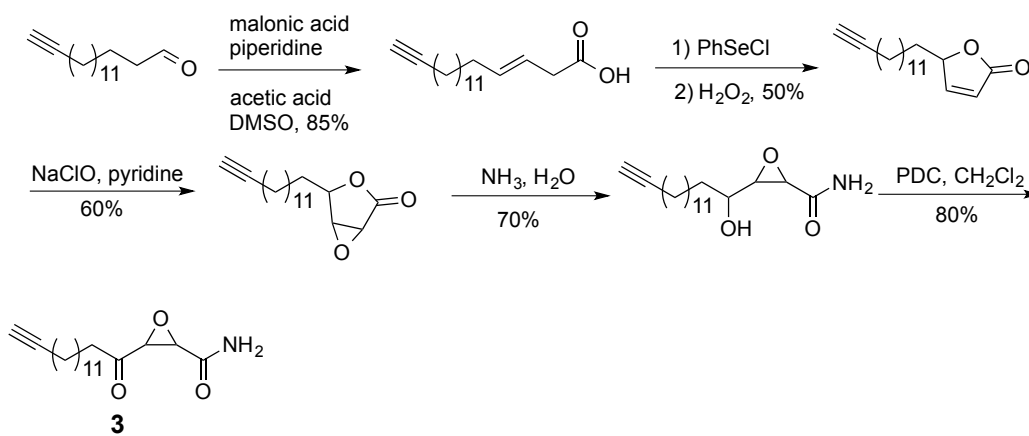

**Scheme S1.** Synthesis of cerulenin analogue 3.

### 1. Synthesis of *cis*-2, 3-Epoxy-4-oxooctadec-17-ynamide (3)

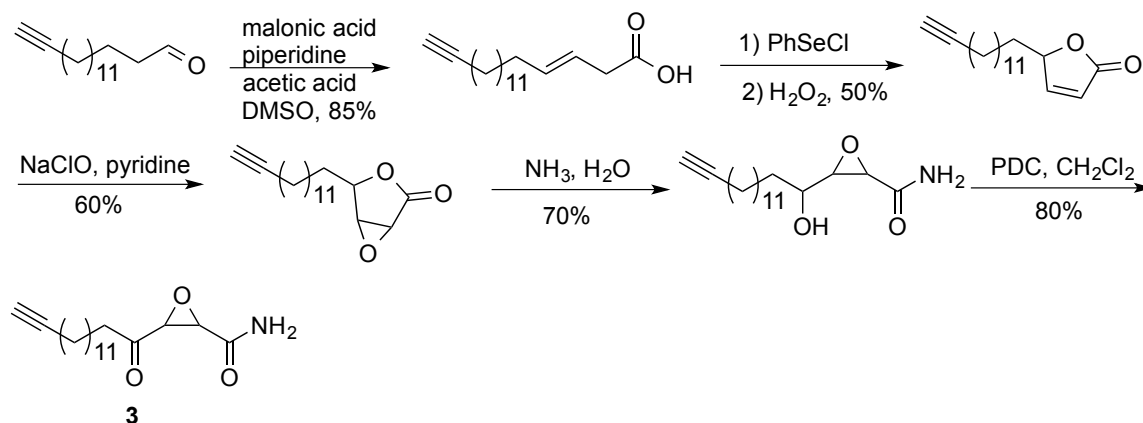

#### (E)-octadec-3-en-17-ynoic acid

Piperidine (11.7  $\mu\text{L}$ , 0.118 mmol) and acetic acid (6.8  $\mu\text{L}$ , 0.118 mmol) were stirred for 5 min in 0.5 mL DMSO at room temperature. Afterwards, malonic acid (3.7 g, 35.5 mmol), hexadec-15-ynal (2.8 g,

11.8 mmol) in 10 mL DMSO were added and the reaction mixture was stirred under N<sub>2</sub> atmosphere for 20 min. The solution was stirred at 100 °C for 8 h. The solution was cooled to room temperature and water 20 mL, Et<sub>2</sub>O 20 mL were added sequentially. The aqueous phase was extracted with Et<sub>2</sub>O, washed with water. The combined organic phases were dried (Na<sub>2</sub>SO<sub>4</sub>) and evaporated. The crude product was purified by flash chromatography which gave (*E*)-octadec-3-en-17-ynoic acid as white solid (2.94 g, 85% yield). <sup>1</sup>H NMR (500 MHz, CDCl<sub>3</sub>) δ 5.60 – 5.50 (m, 1H), 5.37 (ddd, *J*=15.2, 7.6, 6.3, 1H), 3.62 (dd, *J*=11.9, 6.0, 2H), 2.29 – 2.23 (m, 2H), 2.18 (td, *J*=7.1, 2.6, 2H), 2.05 – 1.97 (m, 2H), 1.93 (dd, *J*=3.0, 2.2, 1H), 1.58 (d, *J*=1.8, 1H), 1.52 (dt, *J*=15.2, 7.2, 2H), 1.44 – 1.21 (m, 20H). <sup>13</sup>C NMR (126 MHz, CDCl<sub>3</sub>) δ 134.43, 125.63, 84.82, 68.00, 62.02, 35.98, 32.66, 29.61, 29.58, 29.48, 29.45, 29.18, 29.10, 28.75, 28.49, 18.39.

#### **octadec-2-en-17-ynoic acid $\gamma$ -lactone**

PhSeCl solution (78 mg, 0.41 mmol in CH<sub>2</sub>Cl<sub>2</sub>) was added to a solution of (*E*)-octadec-3-en-17-ynoic acid (103 mg, 0.37 mmol) and Et<sub>3</sub>N (41 mg, 0.41 mmol) in CH<sub>2</sub>Cl<sub>2</sub> (10 mL) at –78 °C. The mixture was warmed to –40 °C over 40 minutes and was then concentrated in vacuum. The residue was purified by flash chromatography (50% EtOAc/hexanes) to afford the intermediate product which could be used directly in the next step.

To a solution of the above product in CH<sub>2</sub>Cl<sub>2</sub> (10 mL) at 0 °C was added H<sub>2</sub>O<sub>2</sub> (35% in H<sub>2</sub>O, 200  $\mu$ L). After stirring for 5 min, another 200  $\mu$ L of H<sub>2</sub>O<sub>2</sub> solution was added. The reaction mixture was stirred for another 40 minutes and then concentrated in vacuum. The residue was purified by flash chromatography (50% EtOAc/hexanes) to afford product, octadec-2-en-17-ynoic acid  $\gamma$ -lactone (51 mg, 50% yield). <sup>1</sup>H NMR (500 MHz, CDCl<sub>3</sub>) δ 7.44 (dd, *J*=5.7, 1.5, 1H), 6.10 (dd, *J*=5.7, 2.0, 1H), 5.03 (ddt, *J*=7.3, 5.3, 1.7, 1H), 2.17 (td, *J*=7.1, 2.6, 2H), 1.93 (t, *J*=2.7, 1H), 1.80 – 1.71 (m, 1H), 1.70 – 1.61 (m, 1H), 1.57 – 1.47 (m, 2H), 1.47 – 1.20 (m, 18H). <sup>13</sup>C NMR (126 MHz, CDCl<sub>3</sub>) δ 173.11, 156.24, 121.51, 84.79, 83.40, 68.01, 33.18, 29.53, 29.45, 29.44, 29.35, 29.28, 29.08, 28.73, 28.47, 24.95, 18.38.

#### ***cis*-2, 3-Epoxyoctadec-17-ynoic acid $\gamma$ -lactone**

To the octadec-2-en-17-ynoic acid  $\gamma$ -lactone (500 mg, 1.81 mmol) in pyridine (25 mL) at 0 °C was added sodium hypochlorite solution (5%, 13.5 mL, 9 mmol). The mixture was stirred at 0 °C for 1 h and allowed to reach room temperature over an additional hour. The mixture was poured into CH<sub>2</sub>Cl<sub>2</sub>-water (30-10 mL) and NaHCO<sub>3</sub> solution added (1M, 10 mL). The bicarbonate extract was washed with ethyl acetate, acidified to pH 1, and extracted with ethyl acetate (20 mL). The acid extracts were combined, dried, concentrated, and purified, affording analytically pure epoxy lactone (317 mg, 60% yield). <sup>1</sup>H NMR (500 MHz, CDCl<sub>3</sub>) δ 4.60 – 4.53 (m, 2H), 3.96 (d, *J*=2.5, 2H), 3.77 (dd, *J*=2.5, 0.6, 2H), 2.17 (td, *J*=7.1, 2.6, 4H), 1.93 (t, *J*=2.7, 2H), 1.74 – 1.61 (m, 5H), 1.58 – 1.46 (m, 7H), 1.46 – 1.18 (m, 40H). <sup>13</sup>C NMR (126 MHz, CDCl<sub>3</sub>) δ 170.33, 84.79, 79.81, 68.02, 58.01, 49.79, 32.09, 29.52, 29.46, 29.43, 29.31, 29.22, 29.08, 28.74, 28.48, 24.20, 18.39.

#### ***cis*-2, 3-Epoxy-4-hydroxyoctadec-17-ynamide**

The epoxy lactone (38 mg, 0.13 mmol) in methanol (2 mL) was treated with ammonium hydroxide (15 M, 0.03 mL) at 0 °C. After being stirred at 0 °C for 25 min, the mixture was diluted with CH<sub>2</sub>Cl<sub>2</sub> (20 mL) and 0.5 N HCl (5 mL), and the organic phase was dried, concentrated, and purified, affording the hydroxyl amide (28 mg, 70% yield). <sup>1</sup>H NMR (500 MHz, CDCl<sub>3</sub>) 6.27 (d, *J*=20.0, 2H), 3.54 (d, *J*=4.6, 1H), 3.45 (dd, *J*=7.9, 5.0, 1H), 3.13 (dd, *J*=8.1, 4.6, 1H), 2.18 (td, *J*=7.1, 2.6, 2H), 1.94 (t, *J*=2.7, 1H), 1.67 (ddd, *J*=9.5, 6.6, 4.5, 2H), 1.52 (dt, *J*=14.7, 7.0, 3H), 1.45 – 1.20 (m, 18H). <sup>13</sup>C NMR (126 MHz, CDCl<sub>3</sub>) δ 170.41, 84.81, 68.87, 68.04, 60.12, 54.28, 34.92, 29.61, 29.60, 29.57, 29.53, 29.48, 29.10, 28.75, 28.48, 24.88, 18.39.

### ***cis*-2, 3-Epoxy-4-oxooctadec-17-ynamide**

The hydroxy amide (13 mg, 0.042 mmol) in CH<sub>2</sub>Cl<sub>2</sub> (3 mL) was added at room temperature to a stirred solution of the pyridine dichromate anhydride complex (20 mg) in CH<sub>2</sub>Cl<sub>2</sub> (5 mL). After 15 min the mixture was diluted with ether (5 mL), filtered through Celite, washed with water and then dilute acid, and the organic phase was dried, concentrated, and purified, affording **3** (10.3 mg, 80%). <sup>1</sup>H NMR (500 MHz, CDCl<sub>3</sub>) 6.32 (s, 1H), 5.61 (s, 1H), 3.87 (d, *J*=5.3, 1H), 3.72 (d, *J*=5.3, 1H), 2.65 – 2.49 (m, 2H), 2.17 (td, *J*=7.1, 2.6, 2H), 1.93 (t, *J*=2.7, 1H), 1.70 – 1.56 (m, 2H), 1.55 – 1.46 (m, 2H), 1.43 – 1.15 (m, 17H). <sup>13</sup>C NMR (126 MHz, CDCl<sub>3</sub>) δ 202.65, 167.45, 84.81, 68.03, 58.33, 55.32, 41.13, 29.52, 29.51, 29.45, 29.35, 29.24, 29.08, 29.02, 28.74, 28.48, 23.08, 18.39.

## **2. Cell culture, transfection and labeling**

HEK293A cells (ATCC) were grown in DMEM, supplemented with 10% fetal bovine serum (FBS), 100U/mL penicillin and 100µg/mL streptomycin. Cells were transfected with DHHC-PATs expression vectors using Lipofectamine 2000 (Invitrogen) and further cultured 40-45 h for protein expression.

To label the proteome, cells were cultured with DMEM, supplemented with 1% fatty acid free bovine serum albumin (BSA) for 1 h before labeling. Cells were then treated with probes at concentrations described in the text for indicated time period.

For direct labeling experiments, cell lysates and heat inactivation were prepared as described previously<sup>1</sup>.

## **3. Cell lysate preparation, immunoprecipitation and click reaction**

After removal of the growth medium, cells were washed once with cold PBS, collected and centrifuged at 1200g for 5 min. To lyse cells, cells were re-suspend in 0.150 mL lysis buffer [50 mM TEA-HCl (pH=7.4), 150 mM NaCl, 1% Triton X-100, 0.1% SDS and 1 mM PMSF, 1x Roche complete mini protease inhibitor cocktail]. The mixture was shaken gently for 15 minutes on ice, and

then centrifuged at 15,000 g for 15 minutes to pellet the cell debris. The resulting supernatant was collected to a new tube and protein concentration was analyzed by the BCA assay.

Protein lysate (400 µg) were incubated with 1µg anti-HA antibody for 2 h at 4 °C with rocking and were subsequently immunoprecipitated with 30 µL prewashed Pierce Protein A/G Magnetic Beads (Product# 88803) with rocking for 1 h at 4 °C. The beads were washed three times with PBST and then two times with purified water. Proteins captured on beads were subjected to the click reaction in a 100 uL PBST for at RT 1 h.

100µg cell lysate or immunoprecipitated proteins was reacted with 10µl freshly premixed click reaction reactants for 1 hour at room temperature (RT) as shown in the table below.

| Reagent           | Stock concentration            | Final concentration | Volume |
|-------------------|--------------------------------|---------------------|--------|
| tag-azide         | 10 mM in DMSO                  | 100 µM              | 1 µL   |
| TCEP              | 50 mM in deionized water       | 1 mM                | 2 µL   |
| TBTA              | 2.0 mM in DMSO/t-butanol (1/4) | 100 µM              | 5 µL   |
| CuSO <sub>4</sub> | 50 mM in deionized water       | 1 mM                | 2 µL   |

Tag-azide: biotin-azide

TCEP: tris(2-carboxyethyl)phosphine hydrochloride

TBTA: tris[(1-benzyl-1*H*-1,2,3-triazol-4-yl)methyl]amine

Reactions were stopped by the addition of 10µL of 6x SDS-sample buffer (50mM Tris-HCl (PH=6.8), 6% SDS, 48% Glycerol, 0.03% Bromphenol Blue, 30mM EDTA, 9% MeSH). The protein samples were then heated for 3 min at 95 °C.

For the hydroxylamine treatment, hydroxylamine (2.5% final concentration) was added to the sample before the addition of loading buffer. ~10 µg protein was loaded per lane (4-20% mini-protein TGX precast gels) and separated by SDS-PAGE.

#### 4. Western blotting

Proteins were transferred onto a PVDF membrane. For immunoblotting of biotin-labeled proteins, the membrane was blocked in 5% BSA TBST solution for 1h at room temperature or overnight at 4 °C. The membrane was then washed 3 times with PBS, incubated with Streptavidin-horseradish peroxidase (HRP) (1 mg/mL, with 1:10,000 dilution in PBST) for 1 h, and developed with ECL Western blotting detection reagents after washing with TBST (3 times, 10 min each washing).

For immunoblotting of HA-tagged proteins, the membrane was blocked in 5% nonfat dried milk in TBST solution for 1h at room temperature or overnight at 4 °C, incubated with anti-HA primary

antibody (diluted 1:10,000 in 5% nonfat dried milk TBST solution) at RT for 1h or overnight at 4 °C, washed with TBST (3 times, 10 min each washing), and incubated with sheep anti-mouse antibody conjugated to HRP (1:10,000 dilution in 5% nonfat dried milk TBST solution) for 1h at RT. At last, the membrane was developed with ECL Western blotting detection reagents after washed with TBST (3 x 10 min).

## **5. Streptavidin beads pull-down and Mass spectrometry studies**

After click chemistry, proteins were precipitated with MeOH at -80 °C overnight, centrifuged at 3500 g and washed twice with chilled MeOH. Protein was air dried and dissolved with 4% SDS buffer (50 mM Tris-HCl, pH 7.4, 150 mM NaCl, 10 mM EDTA, 4% SDS) by sonication. The sample was diluted with 1 volume of 1% Brij97 buffer (50 mM Tris-HCl, pH 7.4, 150 mM NaCl, 10 mM EDTA, 1% Brij97). Streptavidin-agarose beads were pre-washed 3 times with PBS, and then added to the samples. The resulted mixture was rotated at room temperature for 1.5 h, centrifuged at 2000 g for 2 min, and then washed with 3X 0.2 SDS in PBS and 1x 250 mM ammonium bicarbonate. After removing supernatant, the captured proteins were incubated with 500 µL of 8M urea, 50 µL of 500 mM TCEP and 50 µL of 400 mM iodoacetamide for 40 min in dark and then washed twice with 250 mM ammonium bicarbonate. The samples were directly digested on beads and supernatants were collected for LC-MS/MS analysis as described previously<sup>1</sup>.

For endogenous palmitoylated protein detection, cells were labeled using 15-hexadecynoic acid and proteins were pulled down using Streptavidin beads. After washing, the beads were incubated in elution buffer (6 M Urea, 2 % SDS, 30 mM Biotin) for 30 min to elute captured proteins. The eluent samples were boiled for 3 min after addition of loading buffer. Proteins were separated by SDS-PAGE and detected by western blot.

## **References:**

(1) Zheng, B.; DeRan, M.; Li, X.; Liao, X.; Fukata, M.; Wu, X. 2-Bromopalmitate analogues as activity-based probes to explore palmitoyl acyltransferases. *J. Am. Chem. Soc.* **2013**, *135*, 7082-7085.

**Supplementary Table 1:** The list of identified proteins from the mass spectrometry studies using Probe 3, with or without the competition of 2-BP (100μM) or cerulenin (10μM). Total spectra counts were listed for each protein. Proteins highlighted in yellow are the targets which could be competed off by cerulenin, but not 2-BP. Proteins highlighted in green are the targets which could be competed off by 2-BP, but not cerulenin.

| Symbol  | Protein Name                                        | DMSO | Probe 3 | Probe 3 + 2BP | Probe 3 + Cerulenin |
|---------|-----------------------------------------------------|------|---------|---------------|---------------------|
| RTN4    | Reticulon-4                                         | 4    | 164     | 74            | 78                  |
| VDAC2   | Voltage-dependent anion-selective channel protein 2 | 11   | 140     | 30            | 40                  |
| FABP5   | Fatty acid-binding protein, epidermal               | 4    | 103     | 1             | 9                   |
| VDAC3   | Voltage-dependent anion-selective channel protein 3 | 3    | 101     | 48            | 49                  |
| HMOX2   | Heme oxygenase                                      | 1    | 100     | 43            | 45                  |
| ATP2A2  | Sarcoplasmic/endoplasmic reticulum calcium ATPase 2 | 6    | 94      | 30            | 54                  |
| CYB5B   | Cytochrome b5 type B                                | 3    | 63      | 17            | 18                  |
| ATP2A1  | Sarcoplasmic/endoplasmic reticulum calcium ATPase 1 | 5    | 61      | 29            | 38                  |
| HM13    | Minor histocompatibility antigen H13                | 0    | 55      | 21            | 16                  |
| TXNRD1  | Thioredoxin reductase 1, cytoplasmic                | 4    | 54      | 40            | 17                  |
| SEC63   | Translocation protein SEC63 homolog                 | 0    | 38      | 4             | 5                   |
| TXNDC5  | Thioredoxin domain-containing protein 5             | 6    | 38      | 20            | 11                  |
| TRAPPC3 | Trafficking protein particle complex subunit 3      | 0    | 36      | 2             | 5                   |
| ENDOD1  | Endonuclease domain-containing 1 protein            | 0    | 35      | 5             | 6                   |
| XPO1    | Exportin-1                                          | 3    | 35      | 38            | 22                  |
| MTAP    | S-methyl-5'-thioadenosine phosphorylase             | 0    | 34      | 11            | 16                  |
| HCCS    | Cytochrome c-type heme lyase                        | 0    | 33      | 8             | 7                   |
| APOL2   | Apolipoprotein L2                                   | 0    | 32      | 7             | 9                   |
| TMX1    | Thioredoxin-related transmembrane protein 1         | 0    | 31      | 18            | 17                  |
| MLANA   | Melanoma antigen recognized by T-cells 1            | 3    | 28      | 4             | 7                   |
| BACH1   | Transcription regulator protein BACH1               | 0    | 27      | 2             | 4                   |
| SNX1    | Sorting nexin-1                                     | 0    | 27      | 18            | 12                  |
| CD81    | CD81 antigen                                        | 4    | 25      | 5             | 5                   |
| LPCAT2  | Lysophosphatidylcholine acyltransferase 2           | 0    | 25      | 2             | 4                   |
| COMT    | Catechol O-methyltransferase                        | 2    | 24      | 16            | 8                   |
| GPR143  | G-protein coupled receptor 143                      | 1    | 23      | 19            | 15                  |
| NPC1    | Niemann-Pick C1 protein                             | 0    | 23      | 10            | 15                  |
| HEATR3  | HEAT repeat-containing protein 3                    | 0    | 21      | 6             | 1                   |
| TMX3    | Protein disulfide-isomerase TMX3                    | 0    | 21      | 4             | 3                   |

|          |                                                                  |   |    |    |    |
|----------|------------------------------------------------------------------|---|----|----|----|
| TXNDC12  | Thioredoxin domain-containing protein 12                         | 4 | 20 | 7  | 0  |
| GGT7     | Gamma-glutamyltransferase 7                                      | 0 | 19 | 4  | 7  |
| ZDHHC20  | Probable palmitoyltransferase ZDHHC20                            | 0 | 19 | 4  | 7  |
| PCYOX1   | Prenylcysteine oxidase 1                                         | 0 | 18 | 5  | 3  |
| SCAMP3   | Secretory carrier-associated membrane protein 3                  | 0 | 18 | 11 | 10 |
| TMX4     | Thioredoxin-related transmembrane protein 4                      | 0 | 18 | 10 | 2  |
| CISD2    | CDGSH iron-sulfur domain-containing protein 2                    | 0 | 17 | 4  | 7  |
| FKBP8    | Peptidyl-prolyl cis-trans isomerase FKBP8                        | 1 | 17 | 8  | 10 |
| TRPV2    | Transient receptor potential cation channel subfamily V member 2 | 0 | 17 | 9  | 9  |
| AP1AR    | AP-1 complex-associated regulatory protein                       | 0 | 16 | 2  | 0  |
| C16orf58 | UPF0420 protein C16orf58                                         | 0 | 16 | 4  | 10 |
| SNAP23   | Synaptosomal-associated protein 23                               | 0 | 16 | 7  | 6  |
| TTYH2    | Protein tweety homolog 2                                         | 0 | 16 | 9  | 9  |
| CISD1    | CDGSH iron-sulfur domain-containing protein 1                    | 0 | 15 | 6  | 6  |
| DAGLB    | Sn1-specific diacylglycerol lipase beta                          | 0 | 15 | 7  | 5  |
| NCEH1    | Neutral cholesterol ester hydrolase 1                            | 0 | 15 | 5  | 27 |
| TM9SF4   | Transmembrane 9 superfamily member 4                             | 0 | 15 | 7  | 6  |
| TMEM245  | Transmembrane protein 245                                        | 0 | 15 | 6  | 6  |
| XPOT     | Exportin-T                                                       | 0 | 15 | 6  | 5  |
| CDKAL1   | Threonylcarbamoyladenosine tRNA methylthiotransferase            | 0 | 14 | 6  | 9  |
| RTN3     | sapiens                                                          | 0 | 14 | 4  | 5  |
| SLC24A5  | Sodium/potassium/calcium exchanger 5                             | 0 | 14 | 3  | 3  |
| TMED1    | Transmembrane emp24 domain-containing protein 1                  | 0 | 14 | 2  | 4  |
| VEZT     | Vezatin                                                          | 0 | 14 | 5  | 2  |
| ERO1L    | ERO1-like protein alpha                                          | 0 | 13 | 5  | 9  |
| GLTP     | Glycolipid transfer protein                                      | 0 | 13 | 1  | 0  |
| PLIN3    | Perilipin-3                                                      | 0 | 13 | 1  | 2  |
| SLC44A1  | Choline transporter-like protein 1                               | 0 | 13 | 3  | 1  |
| ALG6     | Dolichyl pyrophosphate Man9GlcNAc2 alpha-1,3-glucosyltransferase | 0 | 12 | 1  | 0  |
| BABAM1   | BRISC and BRCA1-A complex member 1                               | 0 | 12 | 6  | 3  |
| HMGCS1   | Hydroxymethylglutaryl-CoA synthase, cytoplasmic                  | 0 | 12 | 9  | 5  |
| MIEN1    | Migration and invasion enhancer 1                                | 0 | 12 | 0  | 0  |
| PTGR2    | Prostaglandin reductase 2                                        | 0 | 12 | 5  | 2  |



|            |                                                              |   |    |    |   |
|------------|--------------------------------------------------------------|---|----|----|---|
| RFTN1      | Raftlin                                                      | 0 | 12 | 6  | 2 |
| SLC7A1     | High affinity cationic amino acid transporter 1              | 0 | 12 | 5  | 9 |
| SNX11      | Sorting nexin-11                                             | 0 | 12 | 3  | 7 |
| TSPAN14    | Tetraspanin-14                                               | 0 | 12 | 0  | 3 |
| ANXA11     | Annexin A11                                                  | 0 | 11 | 5  | 4 |
| PGRMC1     | Membrane-associated progesterone receptor component 1        | 2 | 11 | 1  | 1 |
| SLC15A4    | Solute carrier family 15 member 4                            | 0 | 11 | 3  | 5 |
| SPRY4      | Protein sprouty homolog 4                                    | 0 | 11 | 3  | 3 |
| TM9SF3     | Transmembrane 9 superfamily member 3                         | 0 | 11 | 1  | 1 |
| UBR7       | Putative E3 ubiquitin-protein ligase UBR7                    | 0 | 11 | 0  | 0 |
| PLSCR1     | Phospholipid scramblase 1                                    | 0 | 10 | 5  | 4 |
| PPM1G      | Protein phosphatase 1G                                       | 2 | 10 | 0  | 2 |
| LPCAT1     | Lysophosphatidylcholine acyltransferase 1                    | 0 | 9  | 1  | 2 |
| RABAC1     | Prenylated Rab acceptor protein 1                            | 0 | 9  | 4  | 3 |
| SLC19A2    | Thiamine transporter 1                                       | 0 | 9  | 6  | 6 |
| SORT1      | Sortilin                                                     | 0 | 9  | 6  | 4 |
| ST6GALNAC3 | Alpha-N-acetylgalactosaminide alpha-2,6-sialyltransferase 3  | 0 | 9  | 0  | 0 |
| VKORC1     | Vitamin K epoxide reductase complex subunit 1-like protein 1 | 0 | 9  | 6  | 2 |
| BCCIP      | BRCA2 and CDKN1A-interacting protein                         | 0 | 8  | 1  | 4 |
| CD276      | CD276 antigen                                                | 0 | 8  | 5  | 2 |
| DFNA5      | Non-syndromic hearing impairment protein 5                   | 0 | 8  | 7  | 2 |
| MT-ND5     | NADH-ubiquinone oxidoreductase chain 5                       | 0 | 8  | 1  | 1 |
| RABGGTB    | Geranylgeranyl transferase type-2 subunit beta               | 0 | 8  | 0  | 1 |
| TM9SF2     | Transmembrane 9 superfamily member 2                         | 1 | 8  | 2  | 1 |
| TMEM222    | Transmembrane protein 222                                    | 0 | 8  | 0  | 5 |
| TOMM20     | Mitochondrial import receptor subunit TOM20 homolog          | 0 | 8  | 4  | 3 |
| TRMT112    | tRNA methyltransferase 112 homolog                           | 0 | 8  | 11 | 3 |
| TSPAN4     | Tetraspanin-4                                                | 0 | 8  | 6  | 0 |
| C18orf32   | UPF0729 protein C18orf32                                     | 0 | 7  | 0  | 1 |
| MCOLN1     | Mucolipin-1                                                  | 0 | 7  | 6  | 4 |
| PSEN2      | Presenilin-2                                                 | 0 | 7  | 0  | 2 |
| SLC30A1    | Zinc transporter 1                                           | 0 | 7  | 0  | 2 |
| SLC7A5     | Large neutral amino acids transporter small subunit 1        | 0 | 7  | 3  | 2 |
| STX8       | Syntaxin-8                                                   | 0 | 7  | 2  | 3 |

|              |                                                                                |   |   |   |   |
|--------------|--------------------------------------------------------------------------------|---|---|---|---|
| SURF4        | Surfeit locus protein 4                                                        | 0 | 7 | 3 | 2 |
| VAMP2        | Vesicle-associated membrane protein 2                                          | 0 | 7 | 3 | 4 |
| FAM108B<br>1 | Abhydrolase domain-containing protein<br>FAM108B1                              | 0 | 6 | 1 | 2 |
| PLP1         | Myelin proteolipid protein                                                     | 0 | 6 | 3 | 2 |
| SELT         | Selenoprotein T                                                                | 0 | 6 | 3 | 4 |
| SNX6         | Sorting nexin-6                                                                | 0 | 6 | 2 | 1 |
| TBC1D15      | TBC1 domain family member 15                                                   | 0 | 6 | 1 | 3 |
| TMEM192      | Transmembrane protein 192                                                      | 0 | 6 | 0 | 2 |
| TTYH3        | Protein tweety homolog 3                                                       | 0 | 6 | 7 | 0 |
| VIMP         | Selenoprotein S                                                                | 0 | 6 | 3 | 3 |
| AGPAT9       | Glycerol-3-phosphate acyltransferase 3                                         | 0 | 5 | 1 | 5 |
| CRKL         | Crk-like protein                                                               | 0 | 5 | 4 | 2 |
| NCDN         | Neurochondrin                                                                  | 0 | 5 | 2 | 0 |
| NDUFB11      | NADH dehydrogenase [ubiquinone] 1 beta<br>subcomplex subunit 11, mitochondrial | 0 | 5 | 1 | 1 |
| PML          | Protein PML                                                                    | 0 | 5 | 2 | 5 |
| RER1         | Protein RER1                                                                   | 0 | 5 | 2 | 2 |
| SEC62        | Translocation protein SEC62                                                    | 0 | 5 | 2 | 2 |
| SLC5A6       | Sodium-dependent multivitamin transporter                                      | 0 | 5 | 2 | 3 |
| SPRYD7       | SPRY domain-containing protein 7                                               | 0 | 5 | 4 | 2 |
| TMEM55<br>B  | Transmembrane protein 55B                                                      | 0 | 5 | 0 | 2 |
| VKORC1       | Vitamin K epoxide reductase complex<br>subunit 1                               | 0 | 5 | 0 | 0 |
| CEND1        | Cell cycle exit and neuronal differentiation<br>protein 1                      | 0 | 4 | 1 | 0 |
| COX4I1       | Cytochrome c oxidase subunit 4 isoform 1,<br>mitochondrial                     | 0 | 4 | 0 | 0 |
| CTAG1A       | Cancer/testis antigen 1                                                        | 0 | 4 | 1 | 5 |
| DCTN2        | Dynactin subunit 2                                                             | 0 | 4 | 0 | 5 |
| EPT1         | Ethanolaminephosphotransferase 1                                               | 0 | 4 | 0 | 0 |
| FAM118B      | Protein FAM118B                                                                | 0 | 4 | 0 | 0 |
| SCAMP2       | Secretory carrier-associated membrane<br>protein 2                             | 0 | 4 | 1 | 2 |
| SLC39A1<br>4 | Zinc transporter ZIP14                                                         | 0 | 4 | 2 | 1 |
| TMEM63<br>A  | Transmembrane protein 63A                                                      | 0 | 4 | 3 | 0 |
| ALG11        | GDP-Man:Man(3)GlcNAc(2)-PP-Dol<br>alpha-1,2-mannosyltransferase                | 0 | 3 | 0 | 2 |

|              |                                                                                   |   |   |   |   |
|--------------|-----------------------------------------------------------------------------------|---|---|---|---|
| C9orf91      | Transmembrane protein C9orf91                                                     | 0 | 3 | 1 | 2 |
| CEPT1        | Choline/ethanolaminephosphotransferase 1                                          | 0 | 3 | 0 | 0 |
| LNPEP        | Leucyl-cystinyl aminopeptidase                                                    | 0 | 3 | 1 | 0 |
| PLP2         | Proteolipid protein 2                                                             | 0 | 3 | 0 | 0 |
| PLS1         | Plastin-1                                                                         | 0 | 3 | 1 | 2 |
| PQLC3        | PQ-loop repeat-containing protein 3                                               | 0 | 3 | 0 | 1 |
| SDHD         | Succinate dehydrogenase [ubiquinone]<br>cytochrome b small subunit, mitochondrial | 0 | 3 | 0 | 0 |
| SLC22A1<br>8 | Solute carrier family 22 member 18                                                | 0 | 3 | 1 | 1 |
| TMEM164      | Transmembrane protein 164                                                         | 0 | 3 | 0 | 0 |
| TPCN2        | Two pore calcium channel protein 2                                                | 0 | 3 | 0 | 1 |
| VAMP4        | Vesicle-associated membrane protein 4                                             | 0 | 3 | 0 | 2 |
| ALG3         | Dol-P-Man:Man(5)GlcNAc(2)-PP-Dol<br>alpha-1,3-mannosyltransferase                 | 0 | 2 | 0 | 0 |
| DPY19L1      | Protein dpy-19 homolog 1                                                          | 0 | 2 | 3 | 0 |
| GLTPD1       | Glycolipid transfer protein domain-containing<br>protein 1                        | 0 | 2 | 0 | 0 |
| LYPLA1       | Acyl-protein thioesterase 1                                                       | 0 | 2 | 0 | 2 |
| MBOAT7       | Lysophospholipid acyltransferase 7                                                | 0 | 2 | 1 | 1 |
| OR1M1        | Olfactory receptor 1M1                                                            | 0 | 2 | 0 | 0 |
| RCE1         | CAAX prenyl protease 2                                                            | 0 | 2 | 0 | 2 |
| RFT1         | Protein RFT1 homolog                                                              | 0 | 2 | 0 | 0 |
| SLC2A1       | Solute carrier family 2, facilitated glucose<br>transporter member 1              | 0 | 2 | 1 | 1 |
| SLC2A13      | Proton myo-inositol cotransporter                                                 | 0 | 2 | 0 | 0 |
| SLC39A1<br>0 | Zinc transporter ZIP10                                                            | 0 | 2 | 0 | 0 |
| SLC43A3      | Solute carrier family 43 member 3                                                 | 0 | 2 | 1 | 0 |
| ST3GAL4      | CMP-N-acetylneuraminate-beta-galactosamide<br>-alpha-2,3-sialyltransferase 4      | 0 | 2 | 0 | 1 |
| TBC1D9B      | TBC1 domain family member 9B                                                      | 0 | 2 | 0 | 0 |
| TMBIM1       | Protein lifeguard 3                                                               | 0 | 2 | 1 | 0 |
| XRCC4        | DNA repair protein XRCC4                                                          | 0 | 2 | 0 | 0 |

**Supplementary Figure S1.** Protein labeling of Probe **3** (5 $\mu$ M) in 501Mel cells with or without palmitoylation inhibitors 2-BP (100  $\mu$ M) or cerulenin (10 $\mu$ M). The cell lysate is subjected to Click chemistry with biotin-azide, the labeled protein is detected by streptavidin blot.

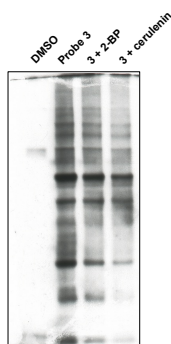

**Supplementary Figure S2.** Validating LPCAT2 and LYPLA1/APT1 are palmitoylated proteins. 501Mel cells are labeled by palmitoylation reporter 15-hexadecynoic acid (probe **1**). The cell lysate is subjected to Click chemistry with biotin-azide, and immunoprecipitated with streptavidin beads. The bounded proteins are then eluted, and palmitoylated endogenous LPCAT2 and LYPLA1/APT1 are detected by western blotting.

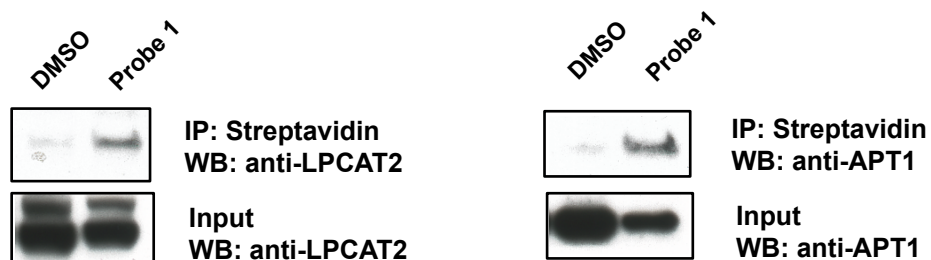

**Appendix: NMR spectra of the compounds**

data\_s2pul\_001  
bz-2-92

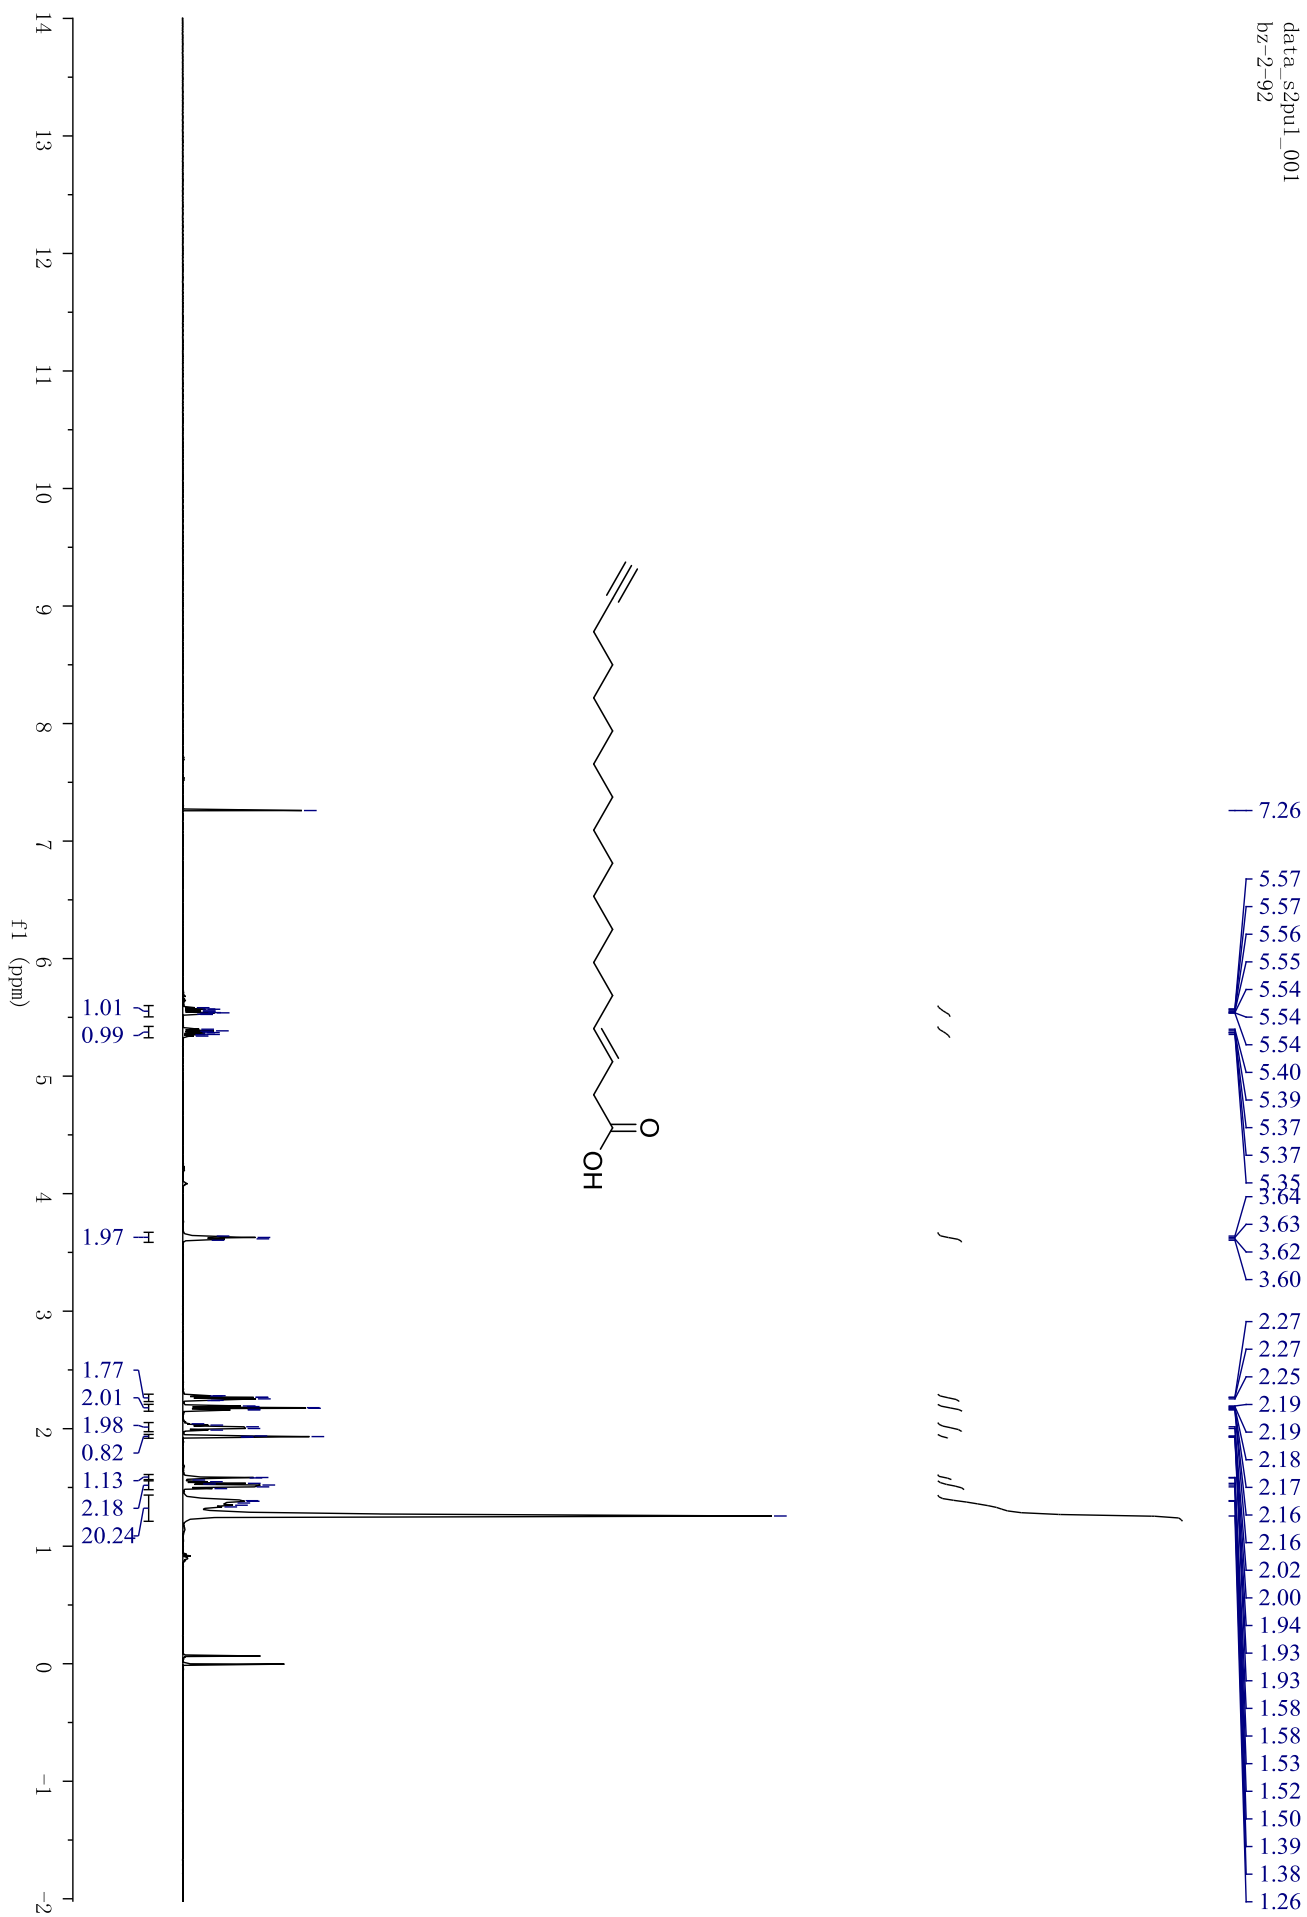

data\_s2pul\_002  
bz-2-92

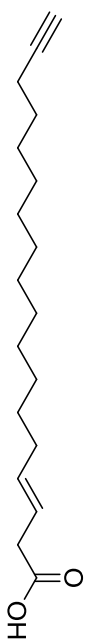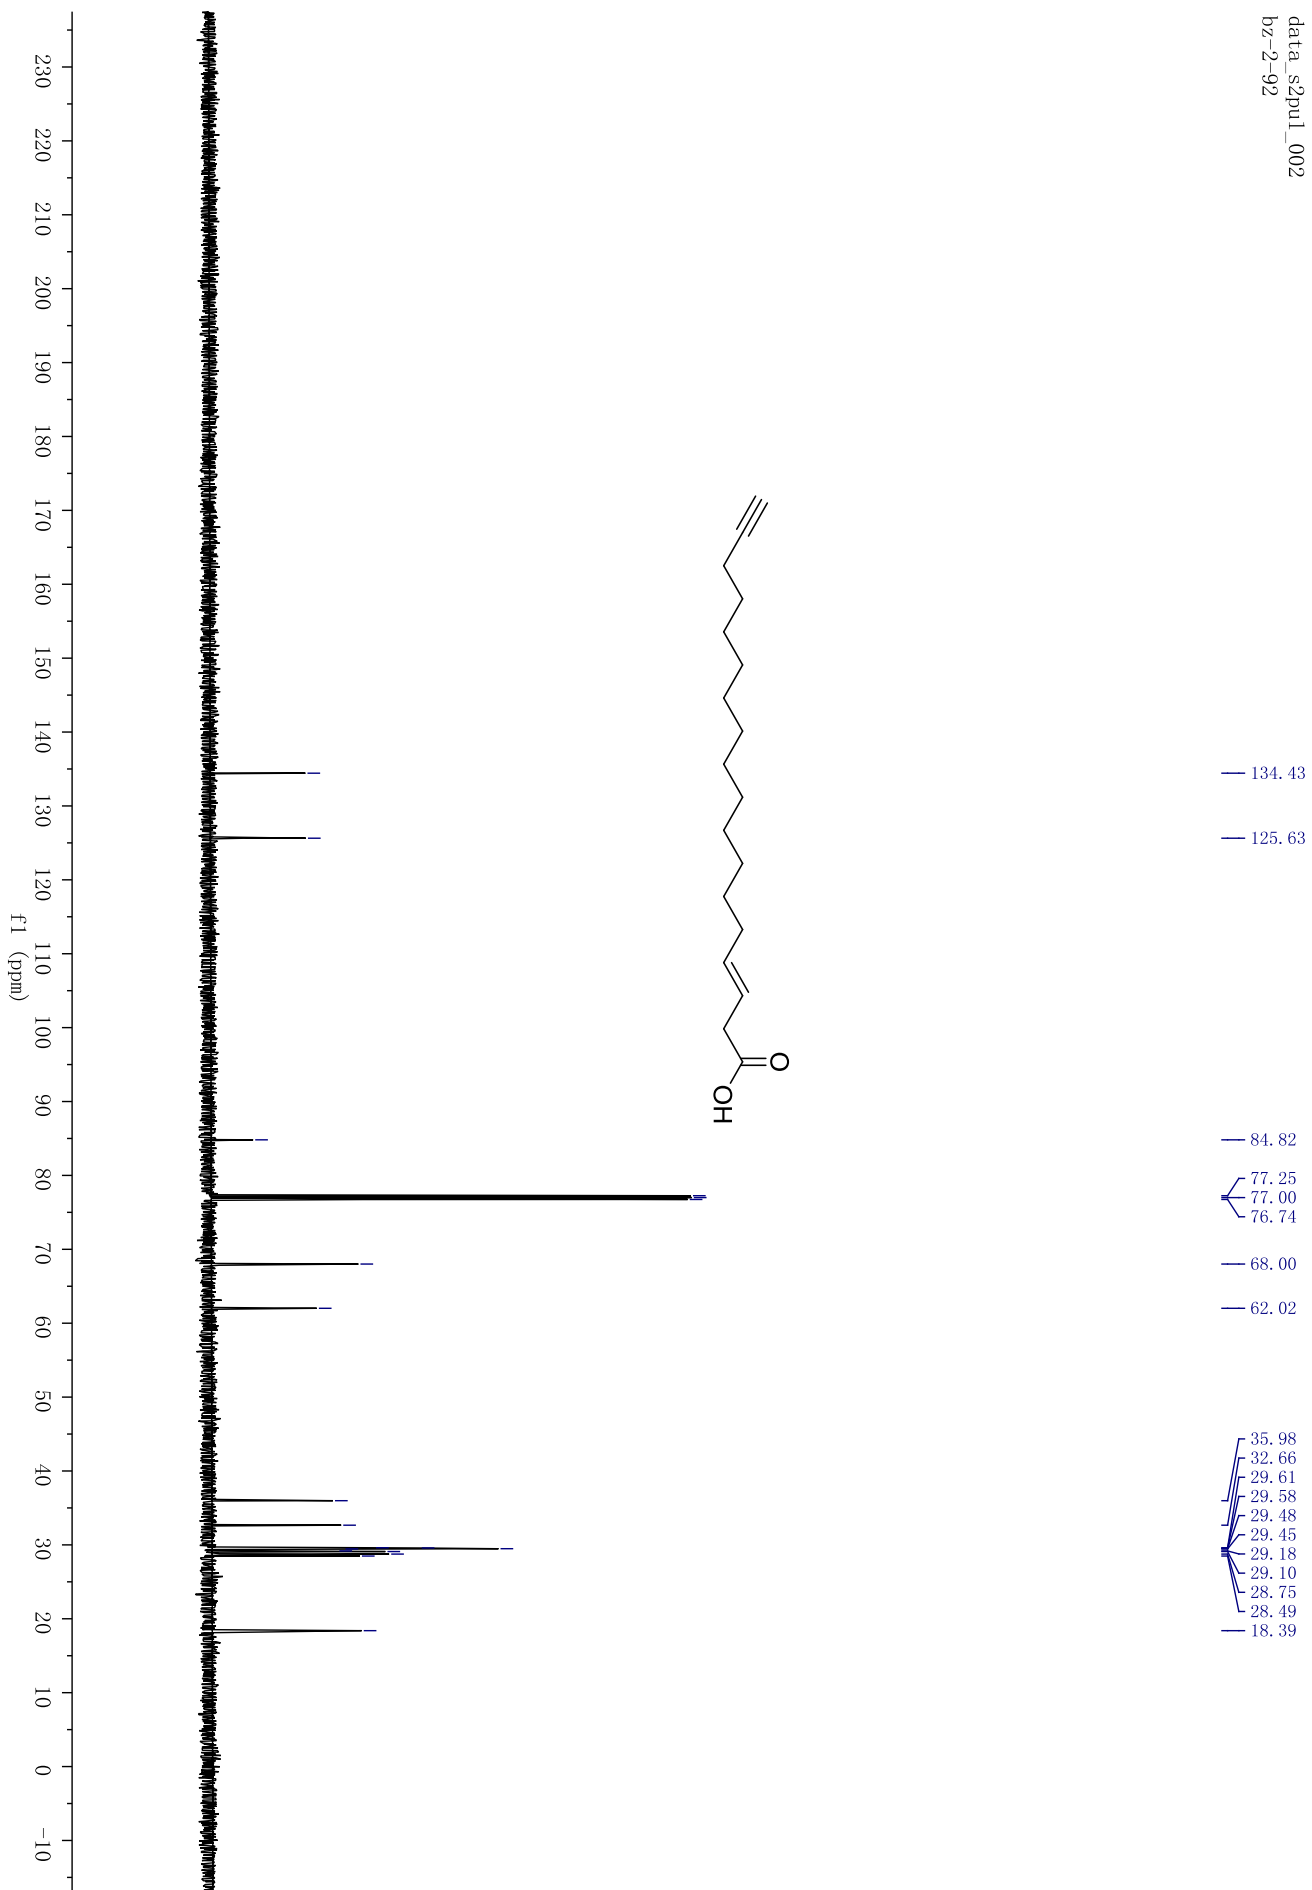

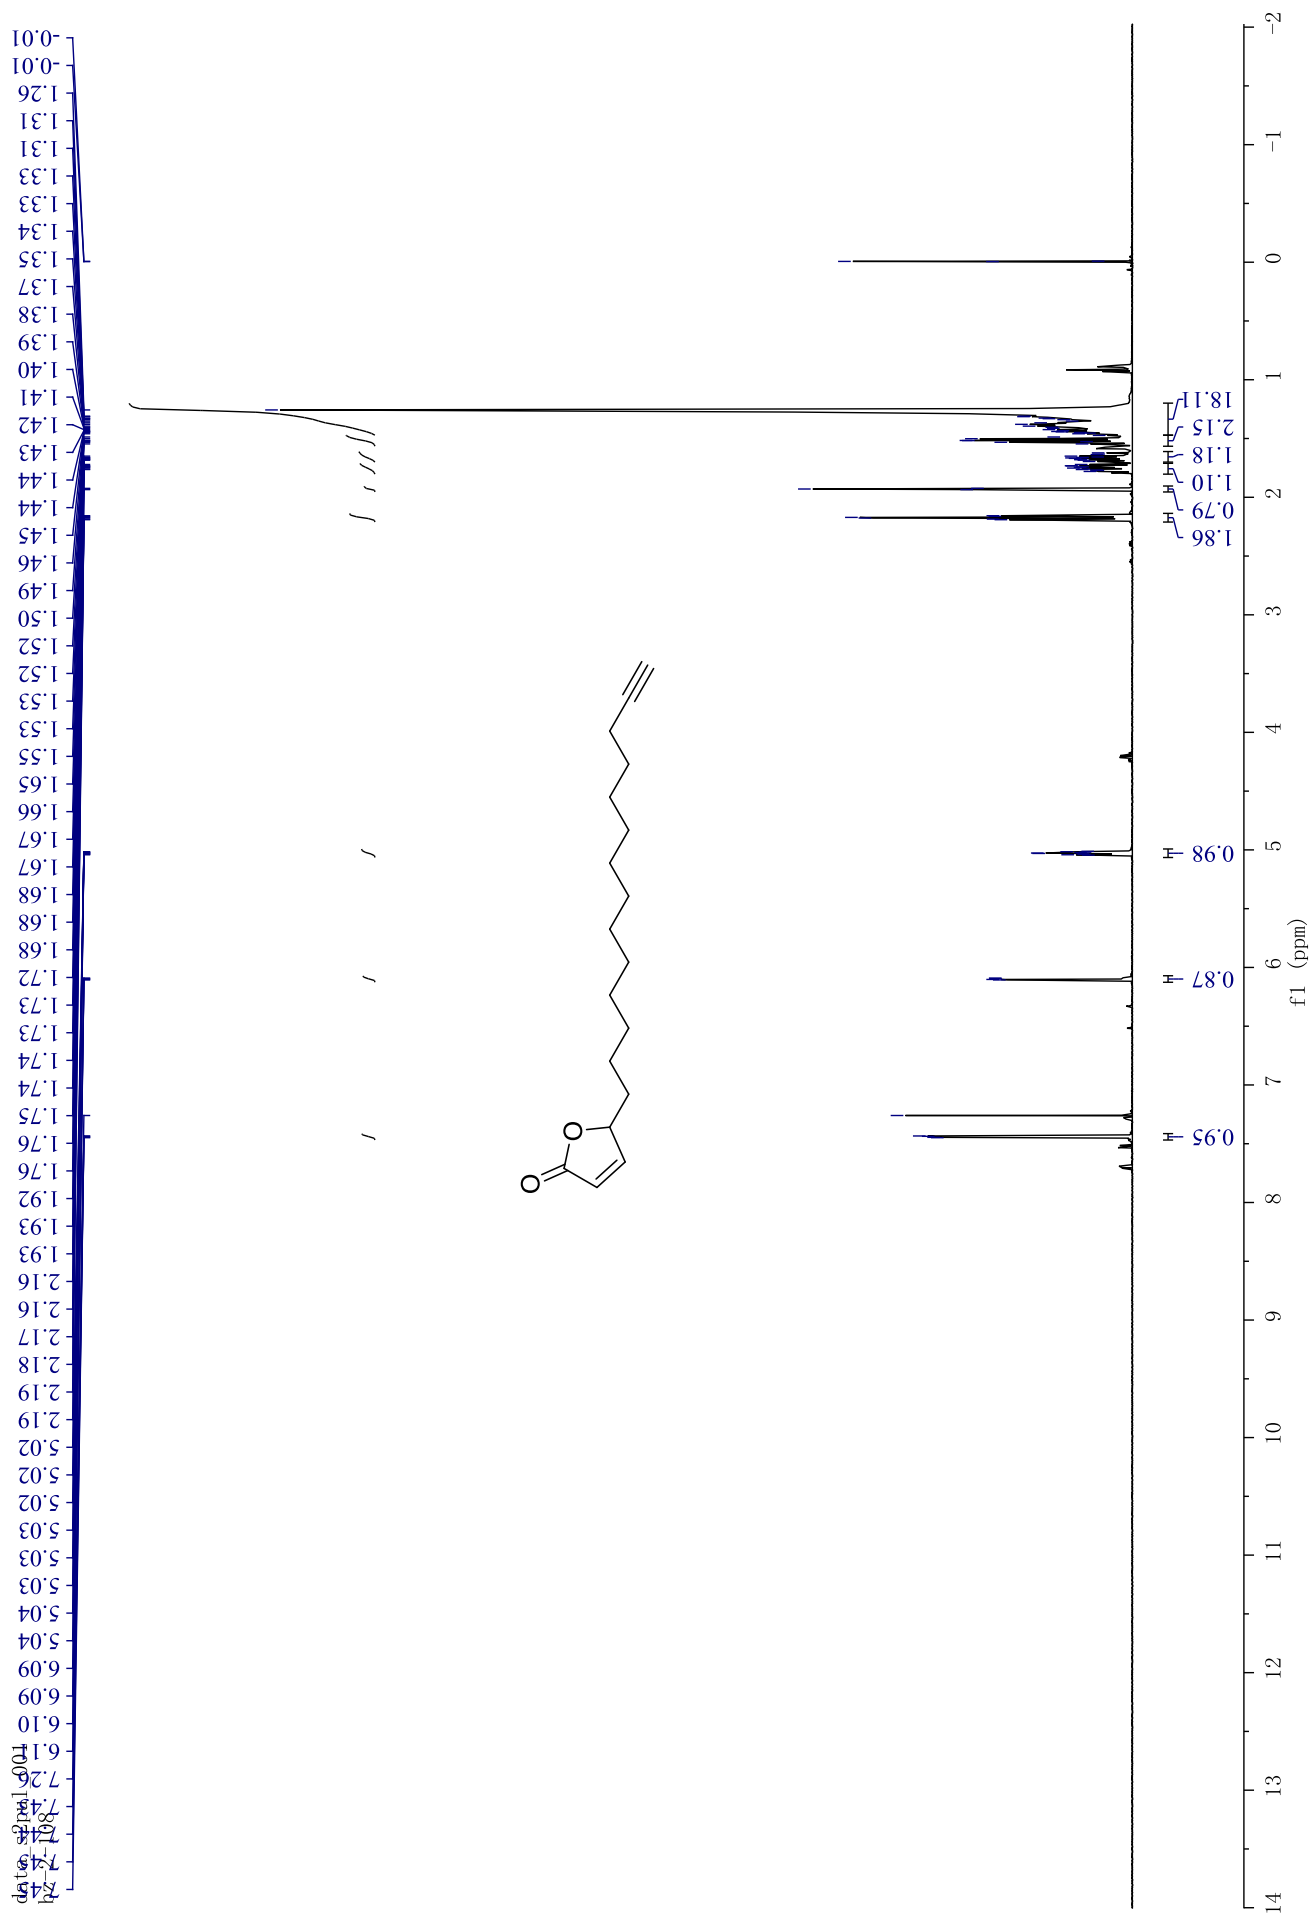

data\_s2pul\_002  
bz-2-108

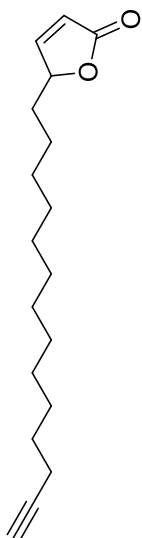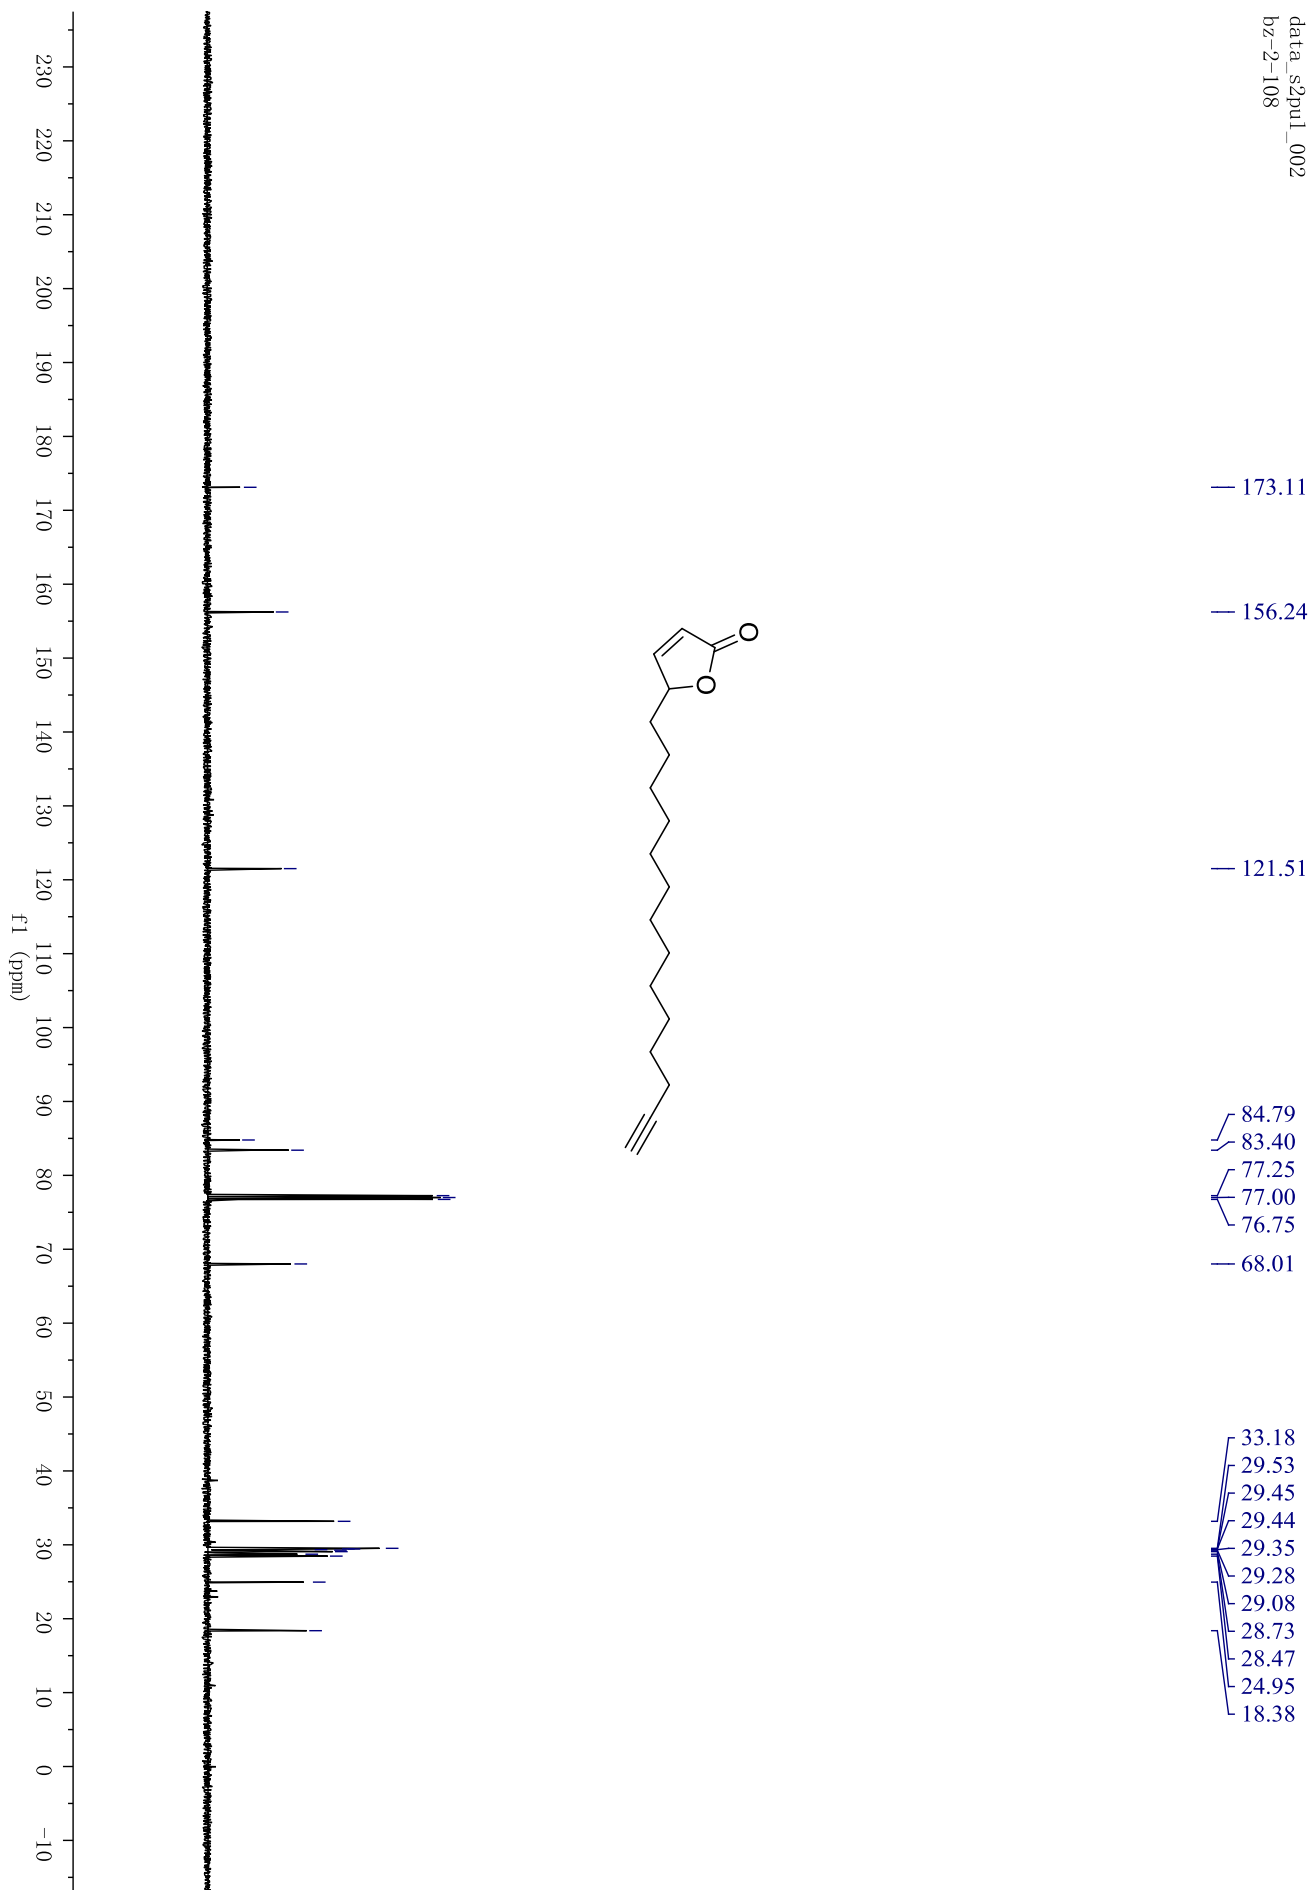



data\_s2pul\_001  
bz-2-109

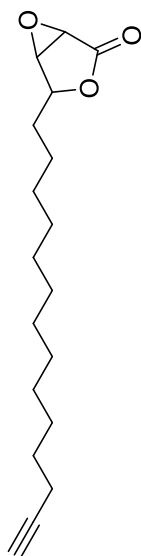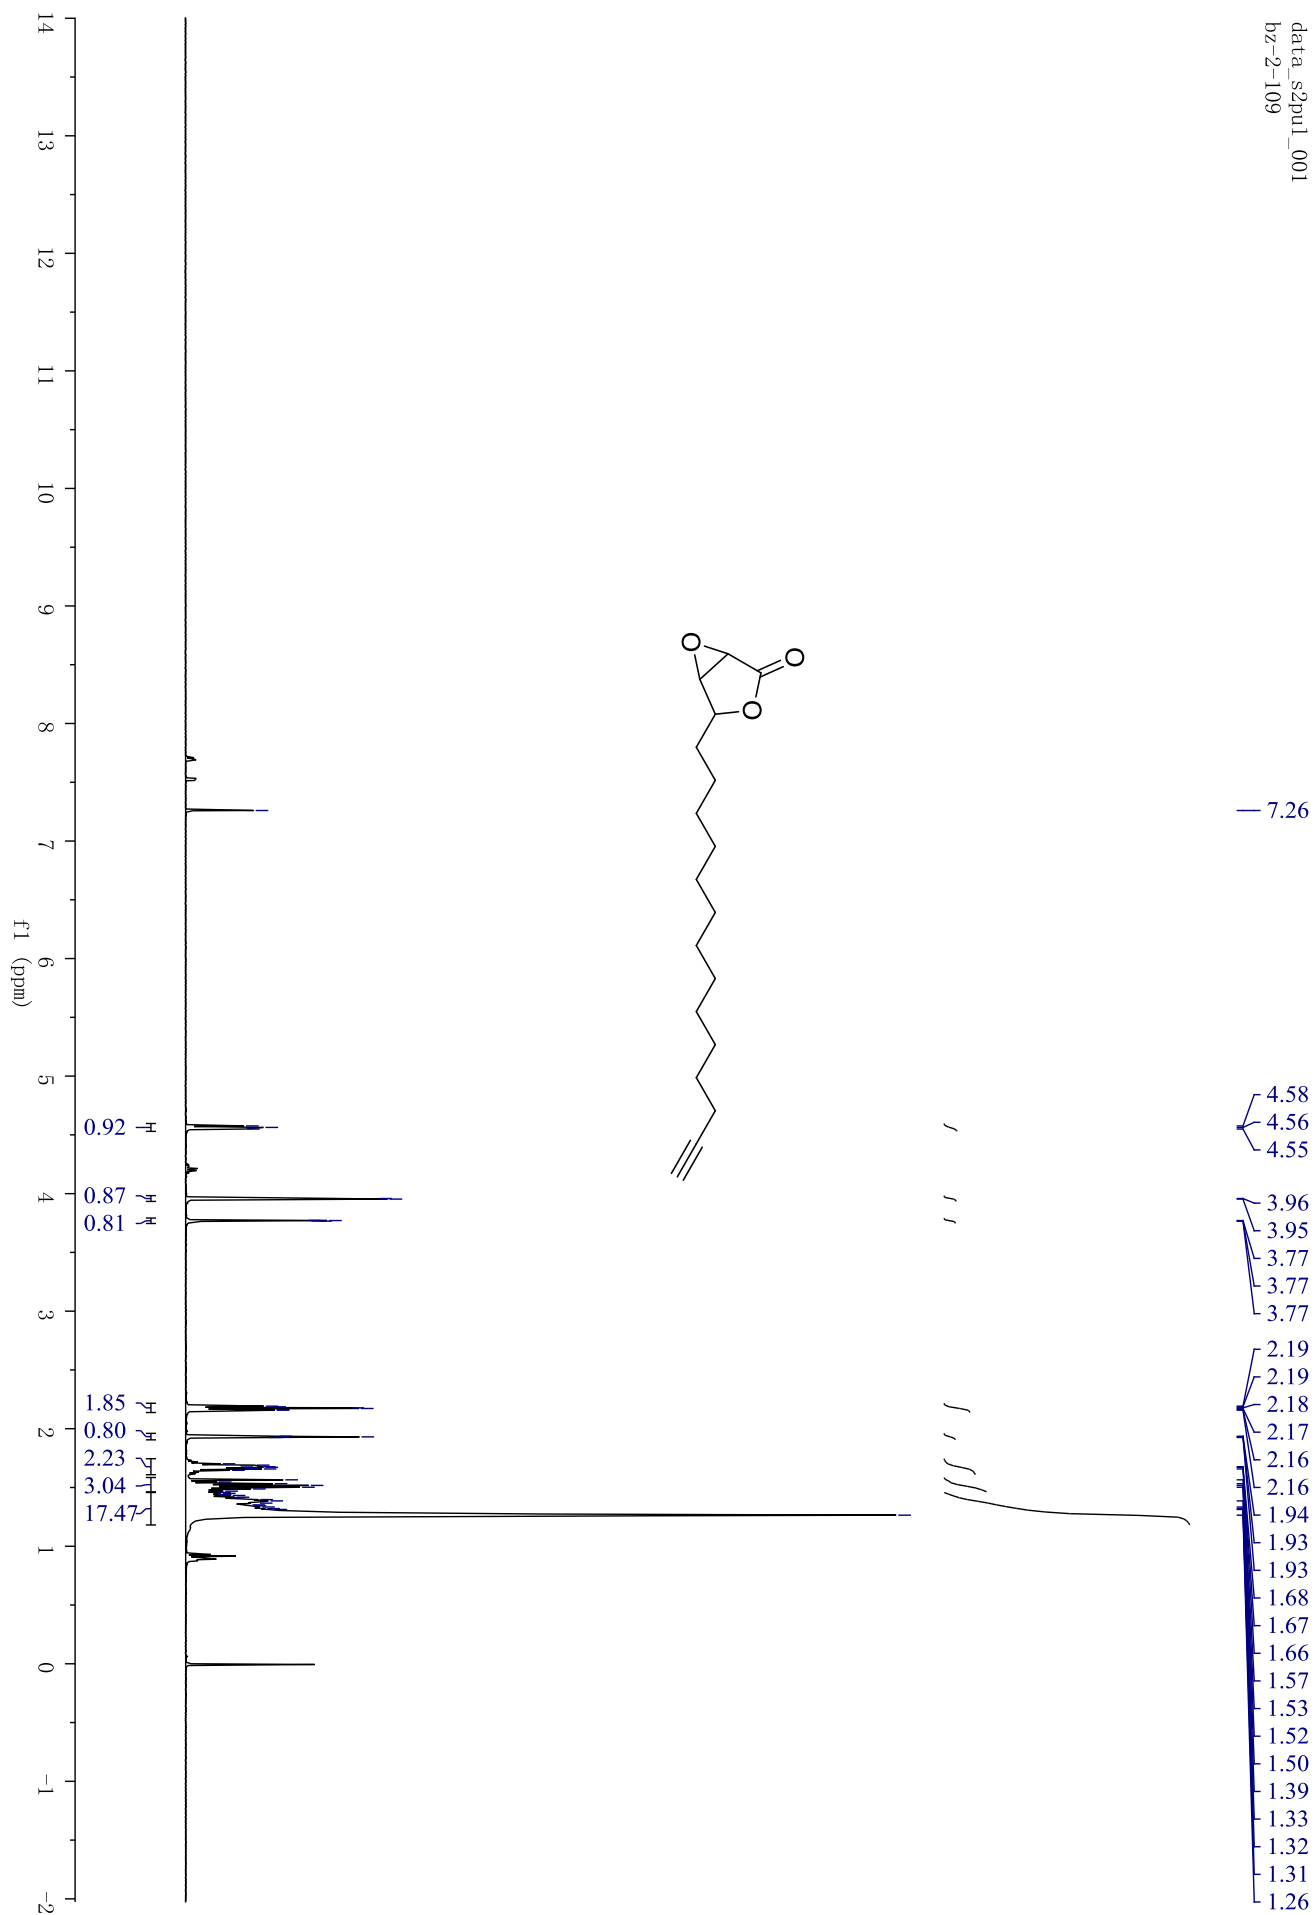

data\_s2pul\_002  
bz-2-109

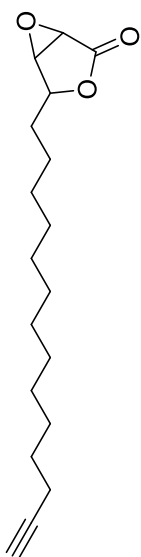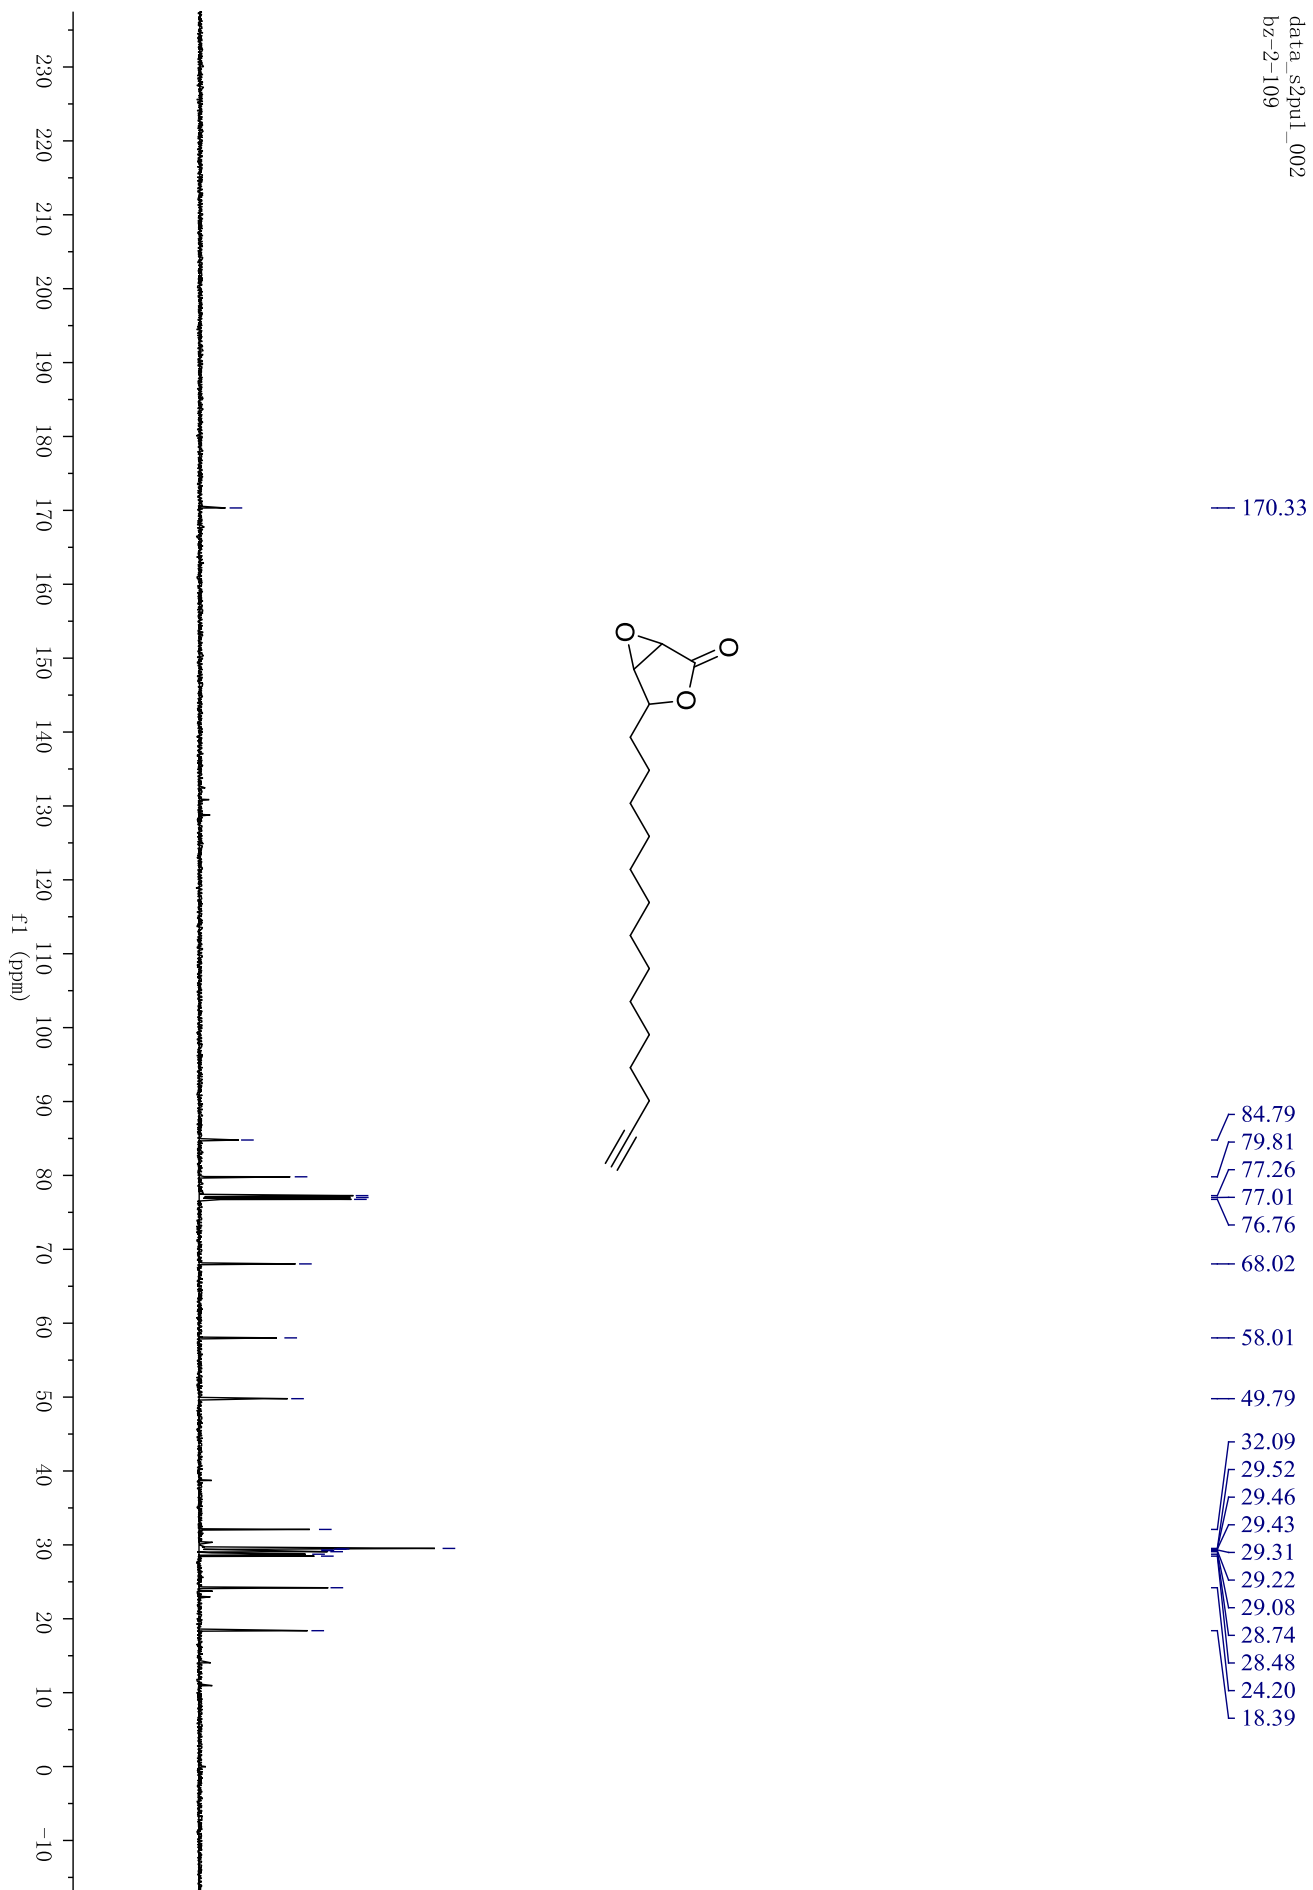

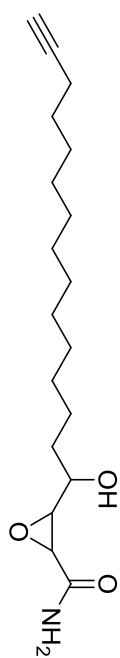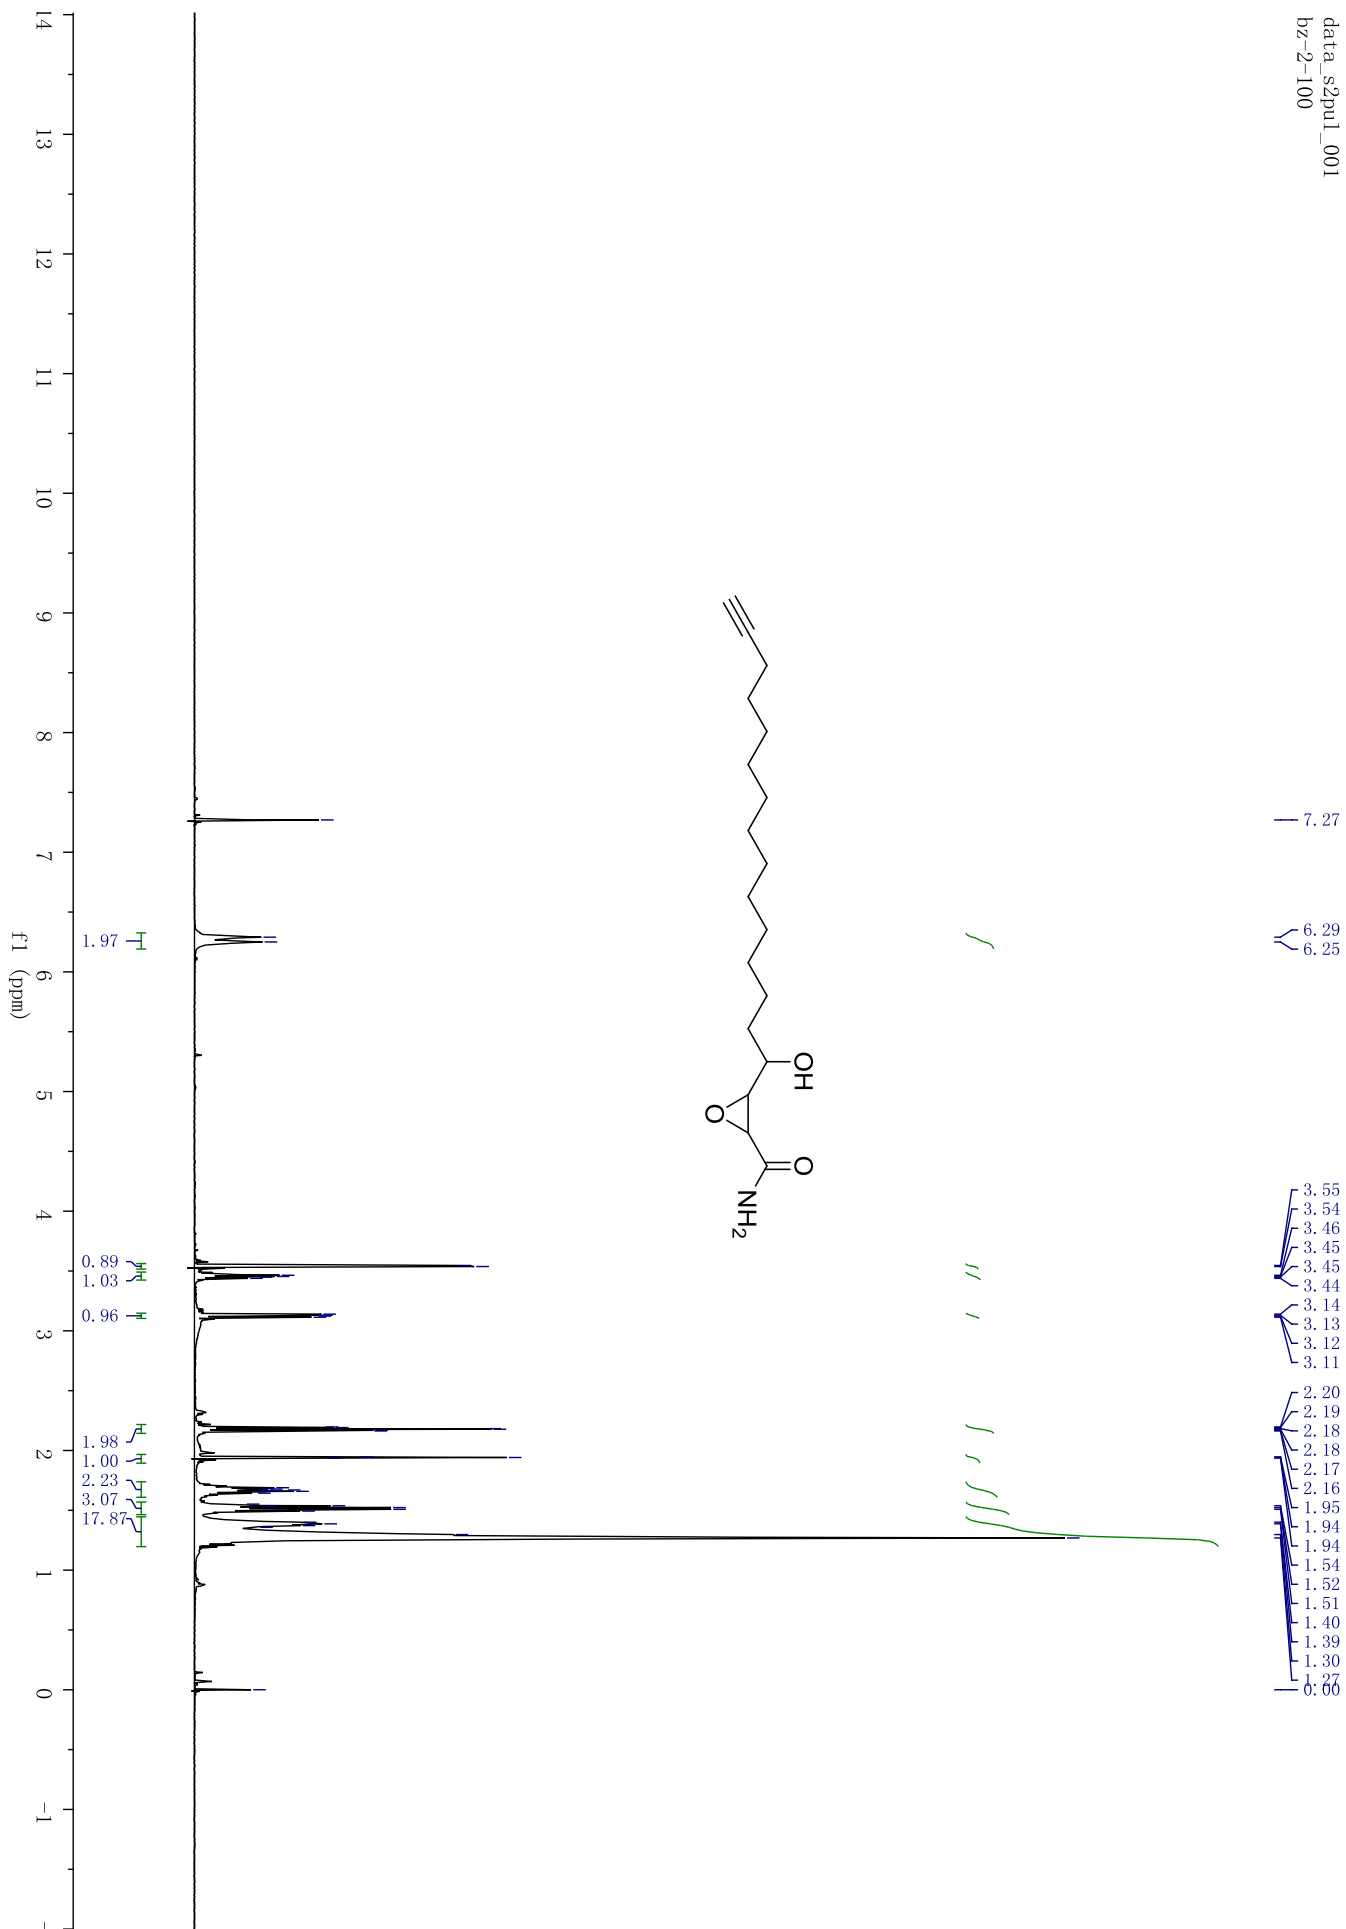

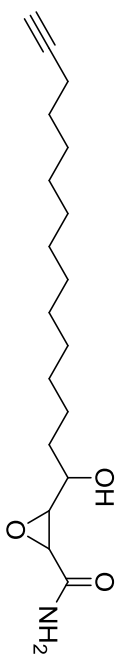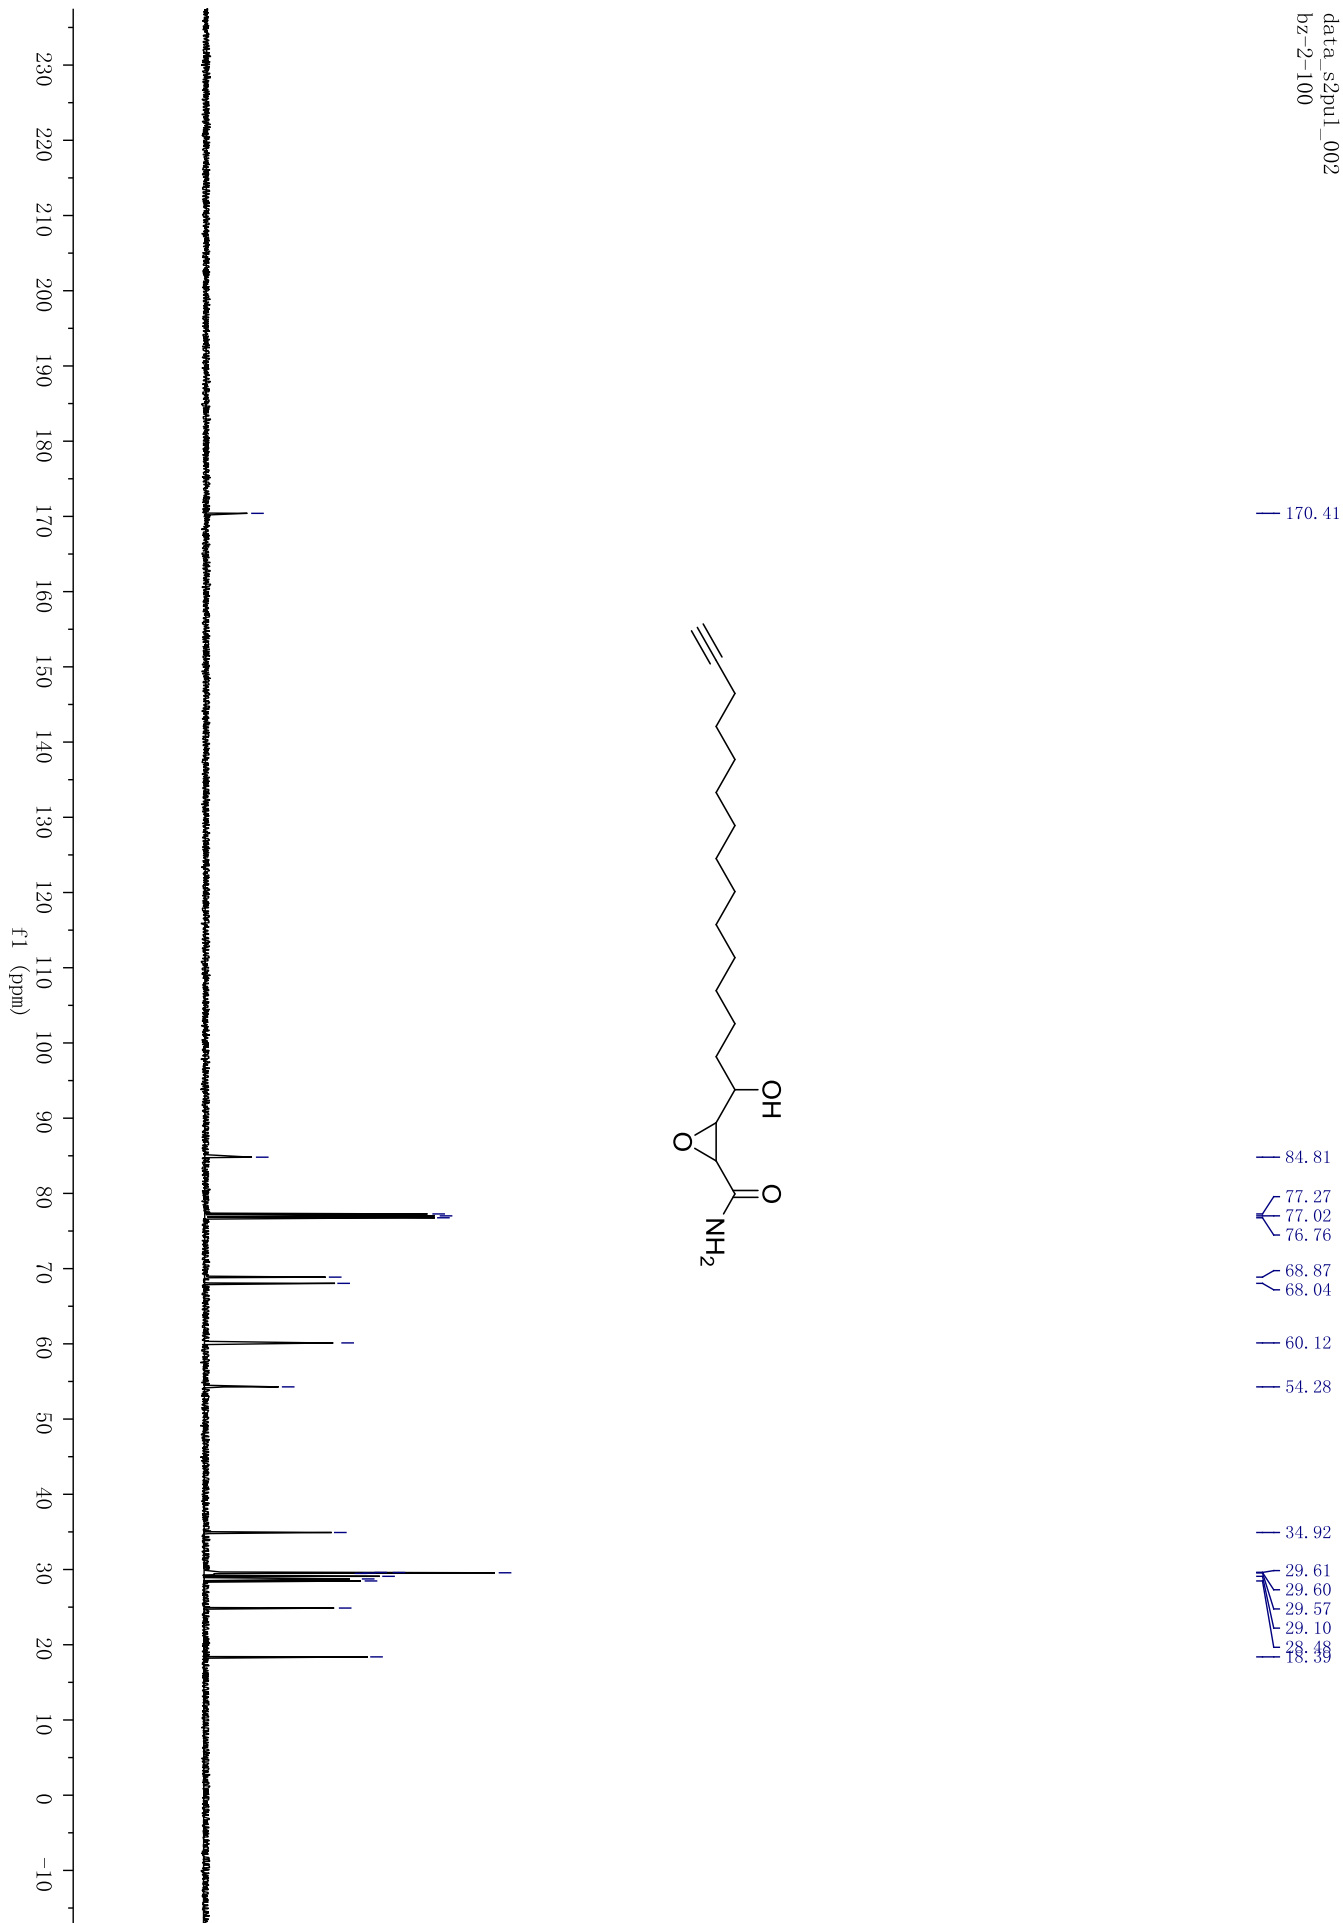

bz-2-104  
bz-2-104

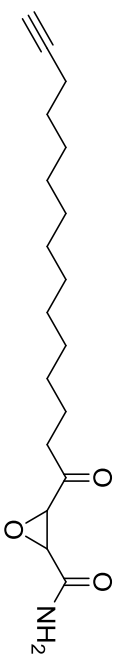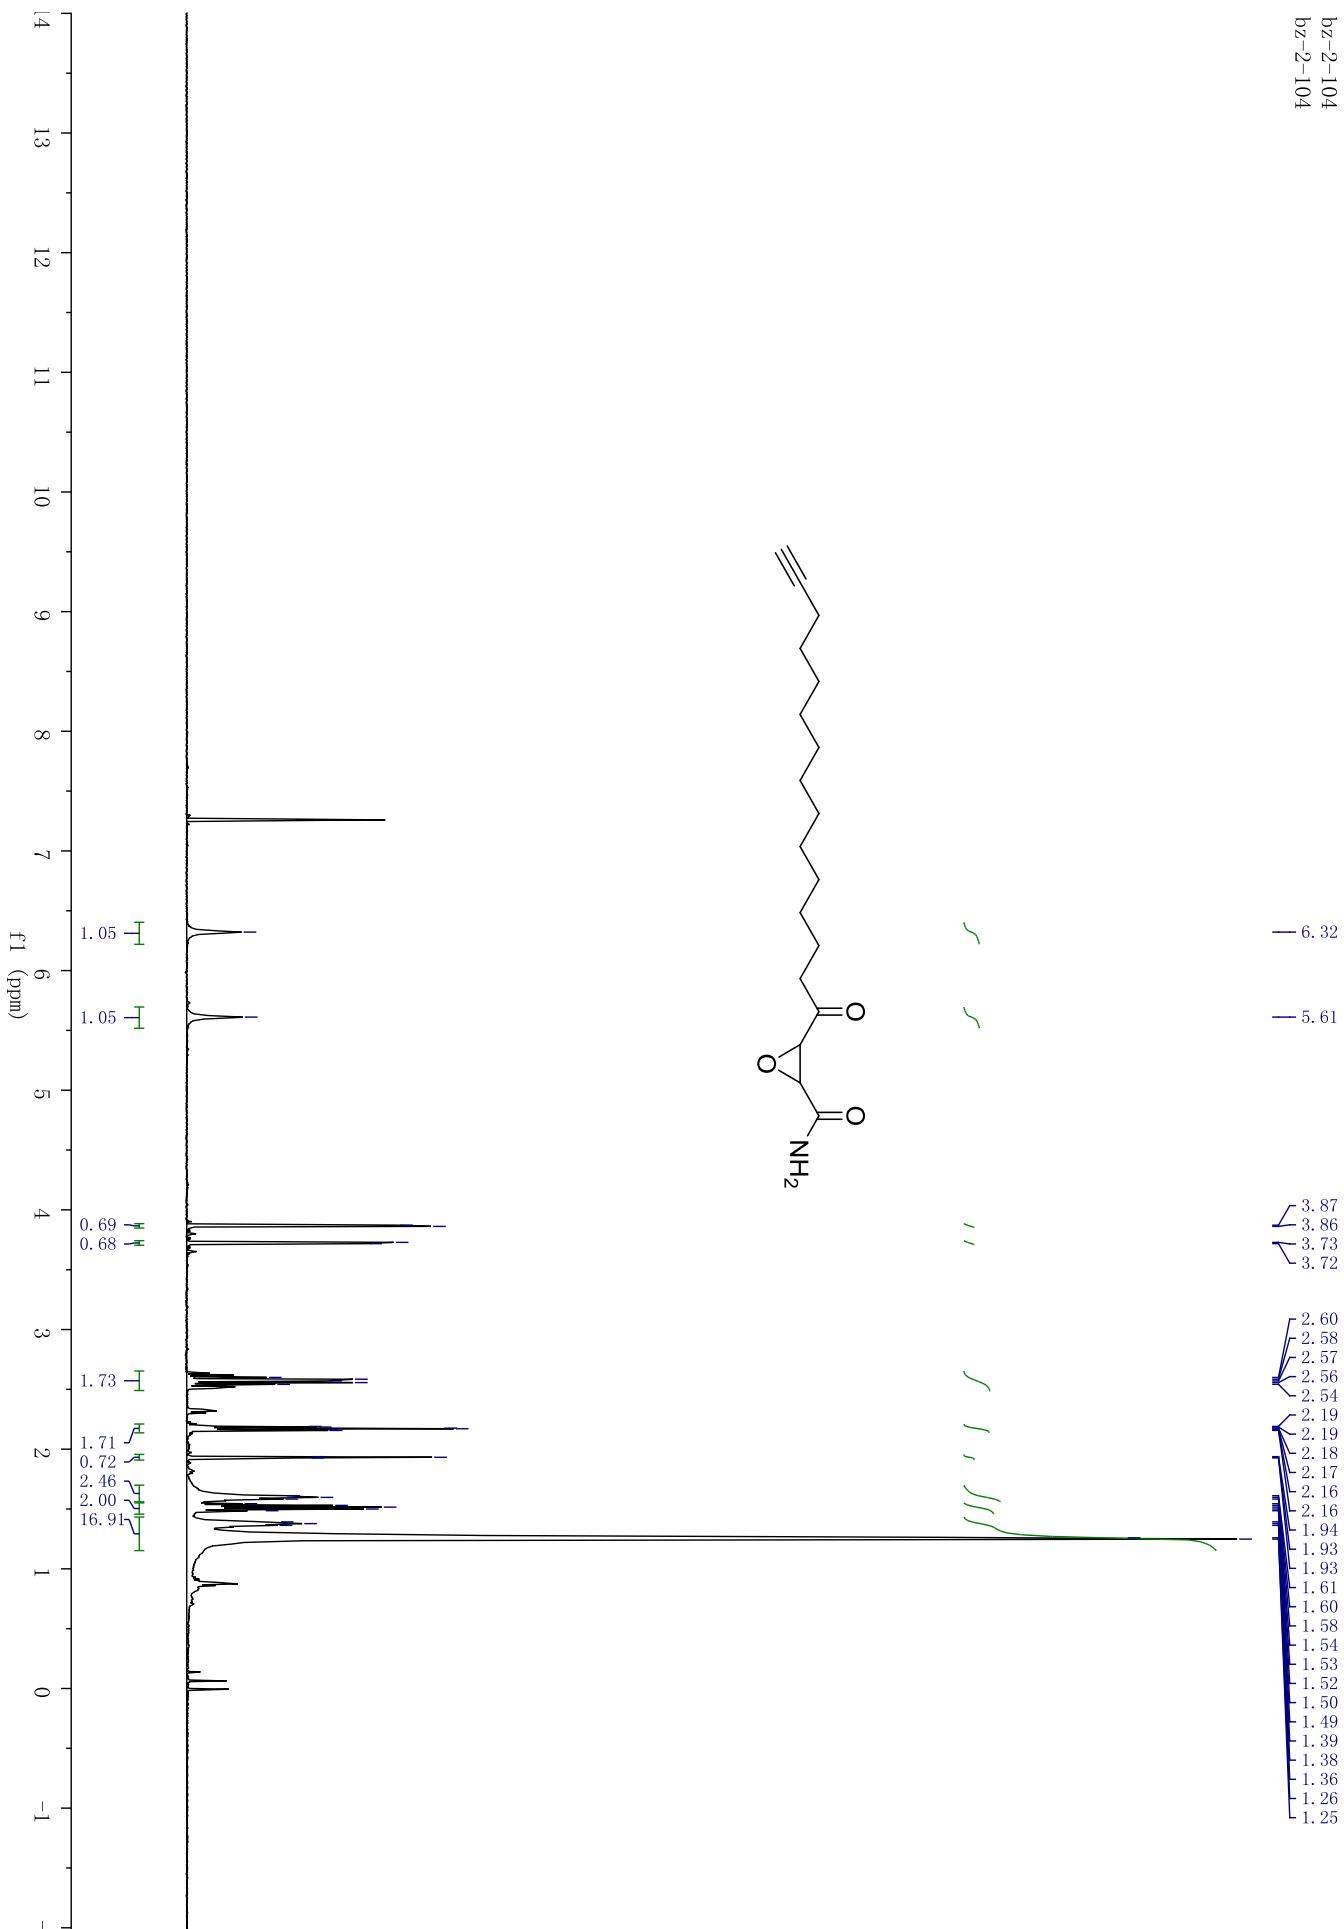

data\_s2pul\_002  
bz-2-104

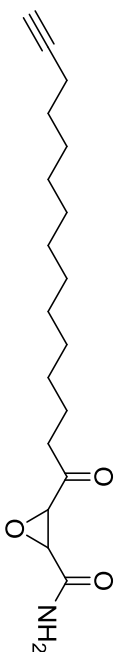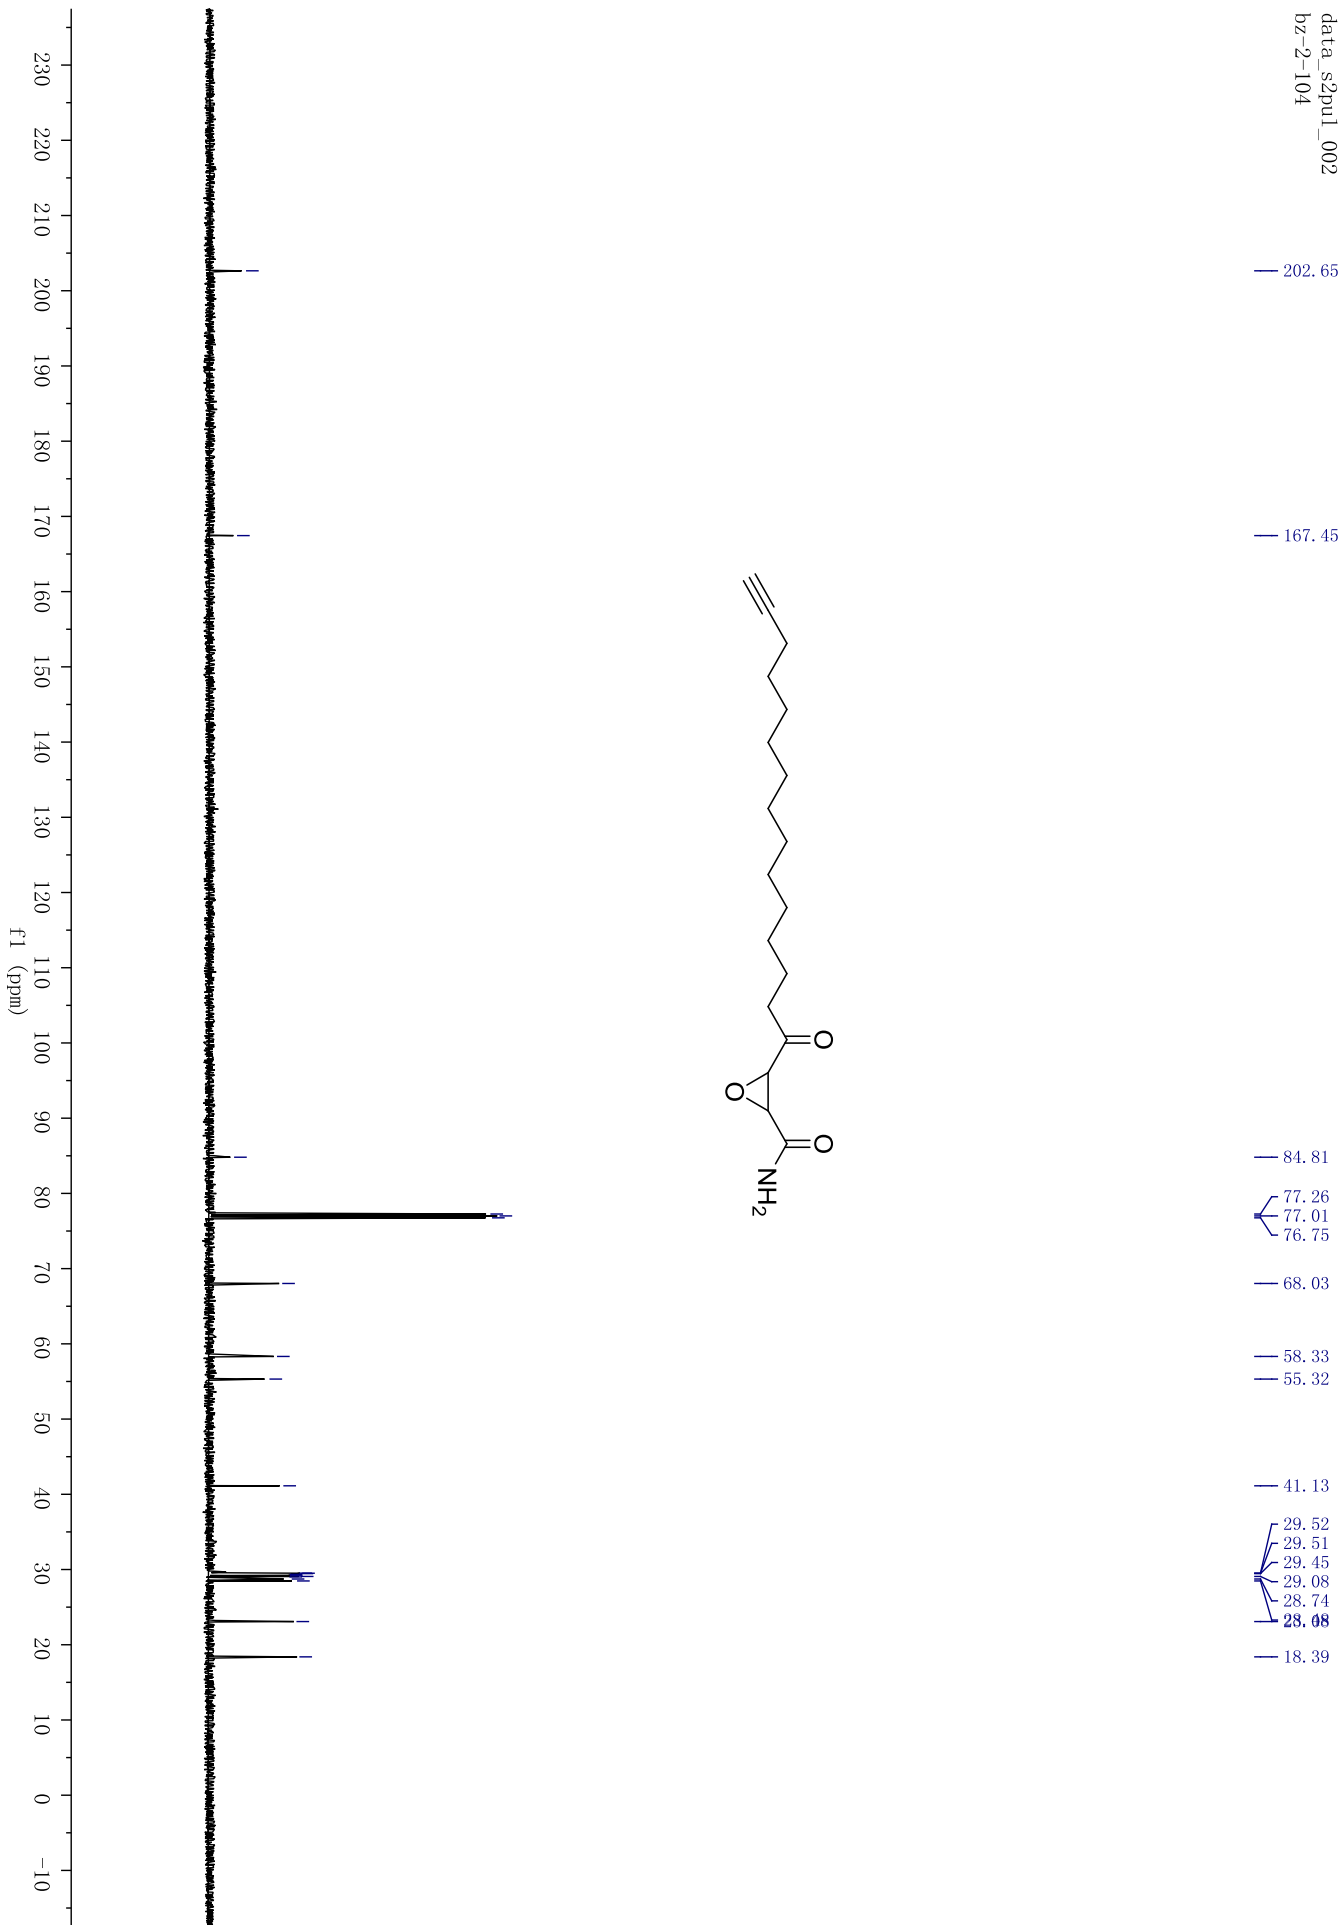

Supplement: Supplementary file 1 [file 3850561]
